# Supplementary material for: Exploration of key genes associated with oxidative stress in polycystic ovary syndrome and experimental validation
Source: Front Med (Lausanne). 2025 Feb 27;12:1493771. doi: 10.3389/fmed.2025.1493771 (PMC11904916; doi:10.3389/fmed.2025.1493771)
Supplement: Supplementary file 6 [file Table_6.xls]

## Sheet: CP.kegggsea
ID	Description	setSize	enrichmentScore	NES	pvalue	p.adjust	qvalues	rank	leading_edge	core_enrichment
hsa04621	NOD-like receptor signaling pathway	145	-0.489136	-2.49136	1e-10	1.665e-08	1.24211e-08	1953	tags=38%, list=14%, signal=33%	114769/58484/4940/64170/5586/25828/1669/1432/9474/11035/834/2919/22861/4938/23118/115362/4671/3716/8767/2633/2921/6347/4790/6772/152138/329/5601/837/2920/64127/29108/10392/388646/3709/90550/118429/10628/3551/7189/820/4792/7099/4939/5027/2634/22900/4615/838/7128/84674/114548/4210/7531/23710/1536
hsa05152	Tuberculosis	134	-0.520602	-2.62502	1e-10	1.665e-08	1.24211e-08	2131	tags=41%, list=15%, signal=35%	8772/535/7879/5869/11151/3916/4261/50617/64170/317/637/1432/2212/5894/51561/5530/3716/7421/8767/4790/6772/3684/5601/3117/5534/8915/64127/718/818/9114/64581/2213/7189/820/91860/7099/26253/10892/7097/3115/4615/972/4046/30835/3109/2207/3586/3459/3119/3458/929/3108/3656/843/581
hsa04145	Phagosome	119	-0.496637	-2.45382	1.60452e-10	1.78101e-08	1.32865e-08	3170	tags=51%, list=23%, signal=40%	3678/60/534/9341/4074/7060/3111/6890/84617/7277/5289/2214/811/3134/535/7879/5869/7280/51807/11151/3916/50617/821/84790/1778/51143/3105/2212/2204/81035/4688/200576/55176/8685/948/3684/3117/718/3133/3688/4973/9114/4481/64581/2213/7037/7057/4689/7099/4353/7097/653361/3115/30835/3109/3119/929/523/6891/3108/1536
hsa04064	NF-kappa B signaling pathway	83	-0.543064	-2.55113	2.55421e-10	2.12638e-08	1.5863e-08	2852	tags=53%, list=20%, signal=42%	5336/7188/5579/7187/4049/79092/958/598/23586/5971/1460/29760/10673/1647/1540/2919/4055/23118/142/2921/4790/6357/329/27040/8915/2920/4050/695/84433/959/3551/7189/4792/7099/10892/4615/7706/5328/7128/929/597/6351/3383/472
hsa05140	Leishmaniasis	60	-0.574939	-2.49733	7.05409e-09	4.06336e-07	3.03131e-07	1607	tags=47%, list=12%, signal=41%	1432/2212/65108/4688/23118/3716/5777/4790/6772/3684/3117/718/3688/7189/4689/4792/7099/7097/653361/3115/4615/3109/3586/3459/3119/3458/3108/1536
hsa05162	Measles	111	-0.473066	-2.31018	7.32137e-09	4.06336e-07	3.03131e-07	3998	tags=58%, list=29%, signal=41%	440275/9451/3455/3454/51135/5599/207/3665/916/7297/10379/5291/4793/896/595/9641/4478/5290/27102/9367/7187/3305/3312/3310/2353/598/6774/23586/8772/1460/4940/317/637/9134/1021/4938/355/23118/1027/3716/8667/4790/6772/5601/4600/2213/3551/7189/4792/7099/7097/917/4939/4599/4615/4179/30835/64135/7128/915/6504/6776/51284/581
hsa05164	Influenza A	123	-0.456712	-2.27633	1.00703e-08	4.79056e-07	3.5738e-07	3347	tags=49%, list=24%, signal=37%	7297/10379/5291/60/4793/896/3606/9641/5290/3111/5579/7187/5604/8106/9407/3717/3627/23586/8772/3836/4261/4940/8795/3841/317/637/390748/1021/5894/834/10482/8743/4938/355/3716/6347/4790/6772/4928/3117/29108/4600/3551/4792/7099/4939/4599/3115/4615/7706/3109/64135/114548/3459/3119/3458/3108/3383/51284/581
hsa05417	Lipid and atherosclerosis	173	-0.406767	-2.12937	3.28905e-08	1.19673e-06	8.92772e-07	1743	tags=38%, list=13%, signal=33%	3606/9641/816/5290/7187/3305/3312/3717/3310/6256/958/2353/598/6774/8795/317/1555/637/1432/4775/4688/834/2919/10451/8743/355/23118/5530/2921/6347/4790/948/5601/5534/2920/29108/818/4973/7409/5606/2081/959/4773/3551/7189/1649/91860/4689/4792/25833/7099/7097/5906/6648/653361/4615/5608/6348/4318/114548/929/1536/3383/581/4780
hsa04142	Lysosome	112	-0.467645	-2.29432	3.37316e-08	1.19673e-06	8.92772e-07	2449	tags=37%, list=18%, signal=30%	6556/8906/162/1213/9476/8907/427/9516/1513/535/6448/2588/3916/50617/9583/1657/768239/968/5538/10577/4891/23457/22901/9114/3073/23312/4668/411/5641/57192/5660/23062/26503/54/26088/1510/4126/1522/1512/285362/3423
hsa04380	Osteoclast differentiation	102	-0.472333	-2.28326	3.59379e-08	1.19673e-06	8.92772e-07	3912	tags=62%, list=28%, signal=45%	5603/11027/79168/3455/3454/5599/5879/207/3937/1385/1435/7297/2534/10379/5291/5336/5290/4286/11024/8061/5604/2355/2214/2353/1513/5971/29760/9846/1432/2212/6688/54209/1540/4688/23118/2885/5530/11025/10990/3716/10859/353514/4790/6772/5601/2354/5534/695/4773/2213/3551/7189/4689/4792/7305/11006/653361/7048/54/5608/1436/3459/3458
hsa04640	Hematopoietic cell lineage	82	-0.507418	-2.37797	4.06798e-08	1.23149e-06	9.18702e-07	3593	tags=59%, list=26%, signal=44%	916/1435/3112/2811/3676/909/3678/945/930/2057/4254/3111/910/925/3815/3570/3566/924/966/3589/951/933/3575/931/1441/920/948/3684/3117/913/7037/917/960/7850/3115/911/1436/3109/915/1438/2322/3119/929/290/3108/4311/952/914
hsa04662	B cell receptor signaling pathway	70	-0.534835	-2.43651	4.81675e-08	1.33665e-06	9.97151e-07	3003	tags=50%, list=22%, signal=39%	930/4793/5336/5290/5579/11024/5604/2353/933/29760/4775/5894/10451/2885/5530/11025/6654/10990/10859/353514/5777/4790/5534/8915/695/7409/27071/84433/4773/2213/3551/4792/10892/11006/25780
hsa05169	Epstein-Barr virus infection	161	-0.402301	-2.08507	7.56442e-08	1.93766e-06	1.44551e-06	3912	tags=53%, list=28%, signal=38%	3455/4616/3454/3065/51135/5599/5879/207/3665/6892/916/3112/7297/10379/5291/9541/930/4793/896/595/9641/919/5336/5290/3111/7188/6890/4193/7187/10018/2923/5701/3683/811/3627/958/965/3134/6774/23586/8772/5971/4940/51426/29760/3105/317/637/1432/9134/1647/1021/4938/355/23118/1027/3716/4790/6772/5601/3117/695/3133/5606/3516/3551/7189/4792/7097/917/4939/960/3115/4615/953/5608/3109/7128/915/3119/6891/3108…
hsa04650	Natural killer cell mediated cytotoxicity	90	-0.480504	-2.27918	9.38078e-08	2.23129e-06	1.66456e-06	3926	tags=54%, list=28%, signal=39%	3823/3455/3454/5879/3937/4277/962/673/2534/5291/2185/919/79465/5336/5290/5579/5604/2214/3683/3821/8795/3105/637/259197/5058/5894/10451/8743/355/2885/5530/6654/5777/27040/5534/3133/6452/4068/7409/4773/7305/10870/2207/3459/3458/3002/3811/135250/3383
hsa04658	Th1 and Th2 cell differentiation	75	-0.511708	-2.35714	1.13403e-07	2.51754e-06	1.87811e-06	3002	tags=51%, list=22%, signal=40%	4793/6778/919/3111/3717/2353/4094/3566/3594/1432/4775/5530/3716/4853/920/4790/6772/5601/27040/3117/5534/30009/4773/6775/3516/3551/4792/917/3115/3596/3109/915/3459/3119/55534/3458/6776/3108
hsa04659	Th17 cell differentiation	91	-0.469804	-2.22287	2.04848e-07	4.26341e-06	3.18054e-06	3002	tags=45%, list=22%, signal=36%	4793/6778/919/3111/3570/196/3717/6256/2353/6774/3566/3594/1432/4775/51561/5530/3716/920/4790/6772/5601/27040/3117/5534/30009/4773/3551/4792/917/3115/7048/3556/3109/915/3662/4088/3459/3119/3458/6776/3108
hsa04612	Antigen processing and presentation	49	-0.564184	-2.37491	7.09477e-07	1.38974e-05	1.03676e-05	3926	tags=67%, list=28%, signal=49%	3823/8625/6892/1385/4802/3112/3805/5720/3111/6890/925/3305/3312/2923/3310/811/3134/4261/3821/821/3105/920/3117/3133/5641/3115/972/3109/3119/3458/3811/6891/3108
hsa04625	C-type lectin receptor signaling pathway	92	-0.460039	-2.1912	8.7519e-07	1.6191e-05	1.20786e-05	2048	tags=37%, list=15%, signal=32%	93978/5971/64170/6361/1432/4775/1960/5058/5894/1540/834/51561/5530/9261/4790/6772/5601/3659/5534/8915/29108/3709/4773/64581/3551/91860/4792/26253/10892/4046/30835/2207/3586/114548
hsa05142	Chagas disease	84	-0.46955	-2.20986	1.01077e-06	1.77151e-05	1.32157e-05	2342	tags=40%, list=17%, signal=34%	811/2353/8772/107/714/712/5519/1432/713/1636/2774/2771/355/6347/4790/5601/2778/718/2769/3551/7189/4792/7099/7097/2773/917/4615/7048/5521/915/6348/3586/3459/3458
hsa05133	Pertussis	63	-0.514378	-2.2497	1.42047e-06	2.36508e-05	1.76437e-05	1831	tags=41%, list=13%, signal=36%	727/714/712/1432/713/834/2771/51561/722/4790/3684/5601/3659/29108/10392/718/3688/3394/7189/91860/7099/2773/4615/3586/114548/929
hsa05145	Toxoplasmosis	90	-0.454391	-2.15531	1.63009e-06	2.58485e-05	1.92832e-05	2573	tags=43%, list=18%, signal=36%	3305/3312/3717/3310/958/598/6774/4261/1432/23533/2771/23118/3716/4790/6772/329/5601/3117/1234/3688/5606/959/3551/7189/5294/4792/7099/7097/2773/345611/3115/4615/5608/3109/3586/3459/3119/3458/3108
hsa05235	PD-L1 expression and PD-1 checkpoint pathway in cancer	77	-0.478712	-2.21858	2.12099e-06	3.14968e-05	2.34969e-05	3270	tags=51%, list=23%, signal=39%	5291/5133/4793/29126/919/5290/5604/3717/2353/6774/1460/1432/4775/5894/27436/10538/5530/3716/920/5777/4790/6772/10125/27040/4215/5534/5606/4773/3551/7189/4792/7099/7097/917/4615/5608/915/3459/3458
hsa05131	Shigellosis	182	-0.358675	-1.89861	2.17546e-06	3.14968e-05	2.34969e-05	3270	tags=38%, list=23%, signal=30%	5291/3611/375/823/3678/60/826/7322/4793/3606/5336/10318/5290/7188/5289/4193/57521/63916/6233/5829/199746/30849/58528/598/8678/9181/831/89869/7323/92610/58484/10095/55062/1729/84335/7321/1432/9267/9474/3059/834/23118/4671/10093/9844/5216/8767/4790/6093/5601/837/8915/29108/10392/718/3688/3709/3551/7189/4792/7099/5581/10892/960/4615/58498/114548/929/472/581
hsa04062	Chemokine signaling pathway	164	-0.372271	-1.93227	2.50334e-06	3.47339e-05	2.59118e-05	2852	tags=38%, list=20%, signal=31%	5336/5290/2782/5579/5604/6372/113/5829/6360/3717/3627/4283/6774/6376/729230/6368/1232/107/6361/6354/408/10663/57580/5058/5894/23533/2919/2771/10451/2885/6654/9844/7454/2921/6347/4790/6093/6357/6772/1234/2920/7409/1794/3551/5294/54331/4792/10235/2788/2773/5906/653361/2268/6355/2870/3055/58191/7852/6348/409/3577/6351/6362
hsa04217	Necroptosis	91	-0.432383	-2.04581	4.51252e-06	6.01067e-05	4.48402e-05	3347	tags=47%, list=24%, signal=36%	7297/10379/823/6609/6778/816/123745/7188/27243/10059/3717/6774/5837/8772/8795/2752/637/197259/1540/11035/5836/834/8743/355/142/3716/6772/329/5601/29108/818/6775/2512/7099/283748/7128/8605/114548/3459/3458/6776/1536/581
hsa04061	Viral protein interaction with cytokine and cytokine receptor	76	-0.470792	-2.18061	7.15615e-06	9.16538e-05	6.83746e-05	2642	tags=46%, list=19%, signal=38%	6372/3570/4049/6360/3627/4283/6376/729230/6368/1232/8795/6361/6354/146433/2919/4055/8809/8807/8743/2921/6347/7133/6357/1234/53833/2920/8764/6355/1436/7852/6348/3586/3577/6351/6362
hsa05167	Kaposi sarcoma-associated herpesvirus infection	151	-0.371824	-1.91732	9.08846e-06	0.000112091	8.36209e-05	3912	tags=48%, list=28%, signal=35%	3455/83439/801/3454/5599/5879/207/3665/1385/4277/6932/7297/10379/5291/942/595/9641/5336/5290/2782/5289/7187/5604/6233/3717/2353/3134/8678/6774/8772/1232/9976/3105/637/1432/4775/57580/1021/5894/23533/2919/285/355/64422/5530/3716/2921/9261/4790/6772/5601/5534/1234/2920/718/3133/6934/3709/4773/5155/3551/5294/54331/91860/4792/131450/2788/5608/3055/3459/3383/581
hsa05132	Salmonella infection	208	-0.332862	-1.79455	1.17823e-05	0.000140125	0.000104534	2994	tags=34%, list=21%, signal=27%	4074/3606/3831/140735/5290/9367/84617/79792/7277/5289/5604/63916/83658/2353/8772/7879/3836/5869/7280/51807/58484/10095/84790/1778/8795/27072/25828/10006/51143/1432/9267/197259/5058/5894/11035/834/112574/8743/23118/3071/4671/10093/9844/5216/8767/4790/51429/329/29109/5601/837/29108/10392/5606/6934/3551/7189/5294/4792/7099/7097/60412/4615/5608/838/9648/58498/114548/929/581
hsa05323	Rheumatoid arthritis	70	-0.471435	-2.14768	1.2695e-05	0.000145773	0.000108748	3538	tags=53%, list=25%, signal=40%	1435/533/3112/534/942/3606/3111/6372/3683/2353/1513/535/3589/50617/10673/7010/2919/51561/8741/2921/6347/3117/2920/4050/9114/7099/7097/1493/3115/54/3109/6348/3119/3458/523/3108/3383
hsa05135	Yersinia infection	120	-0.387923	-1.92308	1.70868e-05	0.000189664	0.000141491	3814	tags=45%, list=27%, signal=33%	51135/5599/5879/207/3937/10096/10092/5291/3676/3678/60/2185/3606/5290/5604/63916/925/5829/2353/8874/58484/10095/5586/1432/2212/4775/834/10451/23118/10093/9844/7454/920/6347/4790/6093/5601/27040/29108/3688/7409/5606/4773/9815/3551/7189/4792/7099/4615/7456/5608/3586/114548/4210
hsa05134	Legionellosis	45	-0.52622	-2.16806	2.41585e-05	0.000259509	0.000193596	3264	tags=51%, list=23%, signal=39%	10767/375/3606/3305/3312/3310/58484/317/1195/834/2919/4671/2921/4790/3684/2920/29108/718/4792/7099/7097/4615/929
hsa04622	RIG-I-like receptor signaling pathway	49	-0.502679	-2.11601	3.48739e-05	0.000355383	0.000265119	3002	tags=53%, list=22%, signal=42%	10010/5599/3665/55593/4793/9641/7187/3627/23586/8772/1432/54941/9474/1540/4790/5601/64343/1654/3551/7189/4792/79132/7706/64135/9636/843
hsa04060	Cytokine-cytokine receptor interaction	218	-0.328215	-1.78078	3.53805e-05	0.000355383	0.000265119	2672	tags=33%, list=19%, signal=27%	55504/27179/6372/3570/4049/27177/6360/84957/3627/958/132014/4283/6376/3566/729230/9966/6368/1232/3594/3589/8795/27242/10673/6361/6354/10663/3575/23765/146433/2919/4055/8809/8807/8743/355/51561/1441/8741/2921/920/6347/7133/6357/9235/1234/53833/2920/4050/8764/959/3557/939/5008/7850/6355/3596/7048/608/3556/1436/58191/7852/6348/1438/3586/3459/3577/3458/8995/6351/6362
hsa04660	T cell receptor signaling pathway	94	-0.414523	-1.97474	3.62853e-05	0.000355383	0.000265119	1607	tags=30%, list=12%, signal=27%	1432/4775/5058/5894/10451/2885/5530/6654/920/5777/4790/5601/10125/27040/5534/8915/7409/84433/959/4773/3551/4792/10892/917/1493/915/3586/3458
hsa05321	Inflammatory bowel disease	53	-0.497736	-2.11427	4.03645e-05	0.000384039	0.000286497	2259	tags=45%, list=16%, signal=38%	6774/4094/3566/3594/8809/8807/51561/4790/6772/3117/64127/30009/6775/7099/7097/3115/3596/3109/4088/3586/3459/3119/3458/3108
hsa05170	Human immunodeficiency virus 1 infection	166	-0.340469	-1.76581	5.47234e-05	0.000506191	0.000377623	2930	tags=35%, list=21%, signal=28%	919/27350/5336/5290/2782/7188/6890/5579/5604/5829/8906/2923/811/2353/162/3134/598/8907/8772/3105/637/1432/4775/5058/5894/2771/355/23118/5530/920/60489/7133/4790/5601/5534/1234/3133/5606/3709/4773/3551/7189/54331/91860/4792/7099/2788/7097/2773/917/4615/5608/7852/915/6891/164668/472/581
hsa05322	Systemic lupus erythematosus	42	-0.514687	-2.08028	7.73604e-05	0.000696243	0.000519404	3085	tags=55%, list=22%, signal=43%	6741/942/3111/717/2214/958/731/727/714/712/2212/6628/713/3117/718/6737/959/3115/3109/3586/3119/3458/3108
hsa04613	Neutrophil extracellular trap formation	94	-0.39582	-1.88564	0.000116177	0.00101808	0.000759498	2852	tags=39%, list=20%, signal=32%	5336/5290/5579/10013/79792/5604/2214/3683/10014/727/1432/2212/10533/5894/2357/4688/834/23569/1184/728/4790/3684/366/837/718/64581/820/4689/7099/4353/7097/653361/8841/9734/27180/1536/51284
hsa05332	Graft-versus-host disease	26	-0.573436	-2.08432	0.000179329	0.00152305	0.00113621	3072	tags=58%, list=22%, signal=45%	942/3111/3134/3821/3105/355/3117/3133/3115/3109/3119/3458/3002/3811/3108
hsa05163	Human cytomegalovirus infection	175	-0.320941	-1.67953	0.000183084	0.00152305	0.00113621	2827	tags=33%, list=20%, signal=26%	5290/2782/7188/6890/5579/5731/4193/5604/113/3570/1978/5829/2923/811/3134/6774/6376/1386/8772/1232/107/3105/637/1432/4775/1021/5894/2771/355/2885/5530/6654/3716/11214/6347/4790/6093/5534/1234/2778/3133/3709/4773/3551/54331/91860/4792/2788/2773/10672/7248/5608/7852/6348/6891/6351/581
hsa05171	Coronavirus disease - COVID-19	177	-0.318226	-1.66979	0.000187523	0.00152305	0.00113621	4232	tags=42%, list=30%, signal=29%	140801/6209/6169/5603/6207/2243/3455/4314/3454/2162/6164/51135/5599/6125/10747/6141/6173/7297/10379/5291/51065/6202/2197/4793/9641/6157/5336/5290/5579/7187/717/3570/6233/3627/2353/6774/23586/731/4940/727/714/712/1432/2212/713/834/1636/6158/4938/728/23118/3716/6347/4790/6772/5601/718/4600/1839/3551/6868/7189/4792/7099/7097/4939/4599/6227/4615/64135/114548/1536/9636/51284
hsa04620	Toll-like receptor signaling pathway	74	-0.421943	-1.94075	0.000230839	0.00183022	0.00136536	3912	tags=51%, list=28%, signal=37%	3455/3454/51135/5599/5879/207/3665/54472/5291/942/9641/5290/7187/5604/3627/958/2353/4283/6696/1513/8772/1432/23118/4790/6772/5601/5606/3551/7189/4792/7099/7097/4615/5608/6348/929/6351/51284
hsa04670	Leukocyte transendothelial migration	94	-0.386325	-1.8404	0.000237867	0.00184208	0.00137421	3270	tags=37%, list=23%, signal=29%	5291/3676/60/2185/4478/5336/5290/5579/83593/5829/3683/4313/1432/83692/10686/4688/2771/10451/7294/6093/3684/5175/644672/3688/7409/7408/4689/2773/5906/653361/7852/58498/4318/1536/3383
hsa04936	Alcoholic liver disease	115	-0.35938	-1.77211	0.000247548	0.00187349	0.00139764	3086	tags=35%, list=22%, signal=27%	217/595/9641/79966/7187/717/6434/23411/23175/8772/51422/9663/727/714/712/1432/23765/713/2919/355/728/23118/130/2921/4790/5601/2920/718/5606/6934/3551/7189/4792/5562/7099/127/4615/51094/5608/929
hsa05310	Asthma	24	-0.588354	-2.11306	0.000288729	0.00213311	0.00159132	936	tags=42%, list=7%, signal=39%	3117/959/3115/3596/3109/2207/3586/3119/6037/3108
hsa05202	Transcriptional misregulation in cancer	154	-0.330358	-1.70355	0.000294664	0.00213311	0.00159132	2364	tags=29%, list=17%, signal=25%	2130/6256/958/598/4094/4300/7403/8864/4299/64332/51426/2005/1669/64919/1647/6688/2120/1027/3398/4790/904/221037/3684/329/604/905/1050/4613/1649/4353/5966/7850/7048/1436/4149/5328/4318/2322/3695/929/3002/6935/597/472/581
hsa05150	Staphylococcus aureus infection	71	-0.401419	-1.83411	0.000415578	0.00294442	0.00219656	2860	tags=44%, list=21%, signal=35%	55894/3111/717/3884/2214/3683/162605/727/1669/714/712/2212/2204/2357/713/728/3684/3117/718/2213/25984/820/1672/3115/3886/3109/3586/3119/3108/3860/3383
hsa04657	IL-17 signaling pathway	82	-0.389077	-1.82338	0.000523665	0.00363292	0.0027102	2958	tags=37%, list=21%, signal=29%	9641/7188/7187/8061/6372/3627/2353/132014/8772/6361/1432/6354/23765/2919/23118/29761/2921/6347/4790/5601/6279/2354/2920/3551/7189/4792/3596/7128/4318/3458
hsa04668	TNF signaling pathway	97	-0.365803	-1.7494	0.000624438	0.00424363	0.00316579	2827	tags=38%, list=20%, signal=31%	5290/7188/7187/5604/6372/4049/10059/3627/2353/6376/1386/8772/4323/1432/197259/11035/2919/8809/355/23118/2921/6347/7133/4790/329/5601/3659/2920/64127/5606/3551/4792/5608/7128/4318/3383/843
hsa05161	Hepatitis B	132	-0.334476	-1.68474	0.00069283	0.00461425	0.00344227	2976	tags=35%, list=21%, signal=28%	6778/9641/5290/5579/7187/5604/3717/2353/6774/23586/1386/8772/317/637/1432/4775/9134/1960/5894/355/23118/2885/6554/6654/3716/4790/6772/5601/5606/4773/1654/6775/3551/7189/4792/7099/7097/4615/7048/5608/64135/4088/4318/6776/843/581
hsa05330	Allograft rejection	27	-0.554254	-2.02454	0.000909497	0.00593848	0.00443016	3072	tags=59%, list=22%, signal=46%	942/3111/958/3134/3105/355/3117/3133/959/3115/3109/3586/3119/3458/3002/3108
hsa04664	Fc epsilon RI signaling pathway	61	-0.411379	-1.79222	0.00119704	0.00766569	0.00571867	3800	tags=46%, list=27%, signal=34%	5599/5879/207/3937/8681/2534/5291/5336/5290/123745/5604/9846/1432/5894/10451/2885/6654/241/5601/27040/695/7409/5606/3596/5608/283748/8605/2207
hsa04010	MAPK signaling pathway	262	-0.272816	-1.5085	0.0012396	0.00778842	0.00581023	3859	tags=39%, list=28%, signal=29%	4616/3481/5567/7867/51135/5599/5879/11184/207/8681/4914/5908/8649/3164/1435/9479/7786/5924/4804/779/673/994/5801/1846/2872/26291/4208/115727/5536/27092/4254/2263/9448/8074/123745/5579/5922/774/5604/55799/3815/3305/8491/3312/3310/2353/4216/10746/1386/5971/6789/2248/2005/1849/1432/7010/4775/1647/408/5058/1847/5894/5494/285/355/23118/2885/5530/6654/9261/4790/5601/10125/4215/5534/9693/1843/8569/5606/…
hsa00280	Valine, leucine and isoleucine degradation	41	0.467901	1.86559	0.00135927	0.00838216	0.00625317	4230	tags=49%, list=30%, signal=34%	10449/34/224/1892/64087/27034/5095/64902/54511/38/3155/587/316/5019/4329/56922/5096/1629/18/3032
hsa04672	Intestinal immune network for IgA production	40	-0.457098	-1.83839	0.00152506	0.00923357	0.00688833	3757	tags=55%, list=27%, signal=40%	10803/57379/3112/3676/942/3111/958/8174/10673/4055/8741/3117/959/3115/608/3109/23308/7852/3586/3119/3695/3108
hsa05130	Pathogenic Escherichia coli infection	161	-0.306209	-1.58704	0.00169997	0.0101088	0.00754123	1939	tags=25%, list=14%, signal=22%	7280/51807/10095/84790/8795/10006/1432/2212/9267/5058/3059/10686/9871/834/55971/8743/355/23118/3071/4671/10093/4627/5777/4790/6093/5601/837/4644/644672/29108/3688/3551/7189/4792/7099/10672/4615/4542/7456/114548/581
hsa04210	Apoptosis	115	-0.331988	-1.63704	0.00176104	0.0102882	0.00767506	2827	tags=30%, list=20%, signal=24%	5290/7277/5604/10018/2353/598/5366/1513/8772/51807/143/84790/8795/317/637/1647/5894/8743/355/142/4790/329/5601/3709/2081/3551/1649/4792/3002/597/1522/1512/843/472/581
hsa04950	Maturity onset diabetes of the young	22	0.548391	1.88813	0.00240105	0.0137853	0.010284	2155	tags=45%, list=15%, signal=38%	4760/389692/3375/2494/3171/3630/4821/6514/222546/168620
hsa05166	Human T-cell leukemia virus 1 infection	180	-0.288558	-1.51368	0.00248051	0.0140001	0.0104442	2987	tags=32%, list=21%, signal=25%	896/595/10524/5290/3111/4488/8061/5604/113/9519/4049/2113/3683/811/958/2353/3134/598/1386/5971/107/821/2005/3105/4775/9134/200186/6688/4055/8850/5530/3716/64682/920/4790/5601/3117/4215/5534/3133/4773/3551/4792/917/7850/3115/7048/2114/3109/915/4088/3119/6776/3108/3383/472/581
hsa04611	Platelet activation	104	-0.332519	-1.60484	0.00344814	0.0191372	0.0142765	3824	tags=42%, list=27%, signal=31%	5567/207/3937/8681/5908/5330/9002/2811/2534/5291/5739/60/5336/5290/123745/54518/113/5499/8673/107/1432/2212/83706/23533/2771/64805/6093/6916/10125/2778/695/3688/7408/3709/5028/5294/10235/2773/5906/10672/283748/8605/2207/6786
hsa05416	Viral myocarditis	46	-0.413609	-1.71401	0.0036261	0.0197949	0.0147672	3465	tags=48%, list=25%, signal=36%	3112/2534/1525/60/4625/942/595/3111/3683/958/3134/27/3105/637/3117/3133/959/3115/3109/3119/3108/3383
hsa05144	Malaria	38	-0.448769	-1.79475	0.00443431	0.0238165	0.0177673	1230	tags=34%, list=9%, signal=31%	4035/2995/6347/948/5175/959/7057/7099/7097/4615/3586/3458/3383
hsa00330	Arginine and proline metabolism	39	0.434943	1.71231	0.00453417	0.0239663	0.0178791	3219	tags=44%, list=23%, signal=34%	5625/4953/1158/224/54498/1610/84735/29920/8974/2806/112483/2628/283208/5033/6611/1160/8659
hsa04940	Type I diabetes mellitus	32	-0.467191	-1.76658	0.00482269	0.0250931	0.0187196	3072	tags=47%, list=22%, signal=37%	942/3111/4049/3134/3105/355/2571/3117/3133/3115/3109/3119/3458/3002/3108
hsa05320	Autoimmune thyroid disease	28	-0.50296	-1.84807	0.00588515	0.0301501	0.0224922	2326	tags=57%, list=17%, signal=48%	942/3111/958/3134/3105/355/3117/3133/959/1493/3115/3109/3586/3119/3002/3108
hsa05221	Acute myeloid leukemia	61	-0.372908	-1.62462	0.00670981	0.0334264	0.0249364	3872	tags=48%, list=28%, signal=34%	83439/207/861/6932/673/5291/595/5290/5604/3815/1978/6774/8864/5292/6688/5894/2885/6654/4790/3684/1050/6934/3551/4353/1436/2322/929/6776/597
hsa05200	Pathways in cancer	432	-0.229069	-1.33835	0.00672543	0.0334264	0.0249364	2987	tags=28%, list=21%, signal=23%	896/595/6778/2057/4254/2263/5336/816/5290/8074/2782/7481/7188/5579/5731/4286/4193/7187/5604/113/3815/3570/83593/10018/867/2113/64399/3717/11186/6256/23566/2353/10928/598/6774/5366/8648/3566/8772/1488/107/1285/6789/3594/2248/51426/5292/4313/23604/317/637/9134/1647/3575/8031/6688/1021/5894/27436/7477/9446/2771/355/2885/1027/51561/1441/6654/3716/4853/4790/26060/8321/6093/6772/329/5601/10125/2778/818…
hsa04080	Neuroactive ligand-receptor interaction	277	0.233641	1.32913	0.00807813	0.0392474	0.0292789	2894	tags=28%, list=21%, signal=23%	165829/2916/2898/5741/5031/3361/2558/4985/5697/1136/134860/3375/2555/8620/5443/2922/122876/2488/2564/1143/2740/10022/56288/9568/3952/1909/2554/4160/8973/2688/3062/4828/57053/51052/6866/2897/2561/4161/56923/3351/339403/117579/84109/4986/1144/5737/5367/2149/624/130574/2565/2895/2695/6863/2837/2743/2918/2847/319100/84539/6915/1910/5024/85569/134864/1081/2892/553/5539/2902/1813/2691/4887/5732/1903/68…
hsa05120	Epithelial cell signaling in Helicobacter pylori infection	58	-0.385578	-1.66838	0.00813235	0.0392474	0.0292789	2119	tags=31%, list=15%, signal=26%	535/50617/1432/5058/2919/2921/4790/5601/1445/2920/10392/9114/1839/3551/6868/4792/3577/523
hsa04722	Neurotrophin signaling pathway	106	-0.311662	-1.51768	0.00872754	0.0415181	0.0309729	3861	tags=38%, list=28%, signal=27%	801/51135/5599/5879/207/4914/5908/4804/673/5291/2549/4793/5336/816/5290/5604/2889/57498/396/1432/5663/5894/2885/6654/8767/9261/4790/5601/4215/818/397/3551/7189/91860/4792/11213/5906/7531/3656/581
hsa05340	Primary immunodeficiency	32	-0.446488	-1.68829	0.00910108	0.0426853	0.0318437	4380	tags=62%, list=31%, signal=43%	3543/3718/5788/973/8625/57379/916/930/6890/925/958/4261/29760/3575/920/695/959/915/64421/6891
hsa04975	Fat digestion and absorption	36	0.429739	1.65935	0.00928569	0.0429463	0.0320383	3779	tags=56%, list=27%, signal=41%	335/1208/949/30814/64241/2806/29881/338/84649/81579/38/346606/1056/10555/8513/391013/8694/64600/64240/50487
hsa04015	Rap1 signaling pathway	183	-0.270123	-1.42705	0.0104318	0.0475863	0.0354998	2919	tags=38%, list=21%, signal=31%	5879/207/3937/5908/5330/1435/9002/9170/4804/673/5291/26291/60/7074/4254/2263/5290/8074/889/5579/54518/5604/2889/113/3815/83593/9223/3683/23566/136/107/2248/1432/10636/7010/5894/2357/285/2771/10451/8631/5216/3684/27040/2778/23094/9693/3688/7409/5606/7408/5028/5155/7057/2251/91860/2254/10235/2773/5906/57568/51466/5608/2246/1436/9732/51735/2255/25780/8817
hsa03250	Viral life cycle - HIV-1	53	-0.388928	-1.65207	0.0107486	0.0483689	0.0360837	1486	tags=28%, list=11%, signal=25%	10955/9972/8178/23534/8850/920/60489/904/6829/1234/905/4600/4599/7852/164668
hsa05168	Herpes simplex virus 1 infection	372	-0.231476	-1.33138	0.0111188	0.0493675	0.0368286	2896	tags=26%, list=21%, signal=21%	79862/7761/90075/59348/5290/148206/27102/56242/3111/7188/6890/7187/51427/4049/440515/1978/93474/2923/100131827/349075/55552/3717/5499/811/3134/7644/598/9310/23586/8772/10224/4940/91664/126295/64170/10838/727/147658/6427/3105/317/637/284323/8683/342892/81931/10482/4938/355/94039/171392/23118/100289678/3716/6347/4790/146434/6772/329/163049/340252/284349/3117/57693/718/3133/8764/10308/7596/3551/7189…
