# Supplementary material for: Exploration of key genes associated with oxidative stress in polycystic ovary syndrome and experimental validation
Source: Front Med (Lausanne). 2025 Feb 27;12:1493771. doi: 10.3389/fmed.2025.1493771 (PMC11904916; doi:10.3389/fmed.2025.1493771)
Supplement: Supplementary file 7 [file Table_7.xls]

## Sheet: DDIT3.kegggsea
ID	Description	setSize	enrichmentScore	NES	pvalue	p.adjust	qvalues	rank	leading_edge	core_enrichment
hsa03010	Ribosome	98	0.559583	2.78594	1e-10	3.33e-08	2.51579e-08	3666	tags=66%, list=26%, signal=49%	6164/6207/51065/6227/6157/6202/6139/6229/6173/6165/2197/6203/6232/6158/6233/7311/6135/6222/6230/6166/6169/140801/29093/6205/6223/6176/6124/6171/51023/9349/6134/11222/6138/6210/6122/64963/63931/6129/55173/79590/219927/6193/6137/6209/65003/64981/6181/23521/9553/4736/6189/6141/6161/3921/6168/55052/6144/6201/6160/6142/11224/6128/6170/6224/64965
hsa05171	Coronavirus disease - COVID-19	177	0.392445	2.14006	2.88824e-09	4.80892e-07	3.6331e-07	3603	tags=50%, list=26%, signal=37%	727/6164/9636/6207/51284/51065/6227/6157/6202/1536/6139/6229/6173/6165/2197/6203/6232/6868/6772/6158/6233/7311/6135/7097/6222/6230/6166/64135/6169/140801/4792/3455/5599/6205/6223/114548/6176/6124/6171/834/9349/6134/3551/3572/6138/6210/6122/7099/5600/1440/6129/5579/6193/6137/6209/4615/6181/1839/51311/5290/23521/4939/4600/3569/4790/1147/5291/4736/6189/6141/6161/29110/5603/3921/3716/6347/2212/6168/6…
hsa04658	Th1 and Th2 cell differentiation	75	0.446704	2.12474	7.64562e-06	0.000709681	0.000536158	3491	tags=52%, list=25%, signal=39%	3459/4773/915/3458/55534/3516/3596/3119/5530/917/6772/3717/3127/6775/4792/5599/3108/3594/3109/3551/3112/4094/30009/6777/5600/916/6776/3566/4790/4853/1147/919/3115/4775/5603/3716/4794/5534/3567
hsa04621	NOD-like receptor signaling pathway	145	0.355287	1.89578	8.52469e-06	0.000709681	0.000536158	3222	tags=45%, list=23%, signal=35%	837/10628/8767/388646/1536/22900/10010/23710/1669/90550/838/6772/820/7531/5586/4210/9474/29108/4792/4671/3455/5599/10059/115362/114548/114769/834/3709/79792/3551/5027/222545/7099/54822/2633/1668/5600/9140/25828/7128/118429/9051/11035/2920/4615/329/64127/22861/3606/841/2921/4939/2634/3569/4790/1147/152138/10392/84674/29110/3428/3320/5603/3716/6347
hsa04659	Th17 cell differentiation	91	0.40345	1.99133	1.68241e-05	0.00112049	0.000846518	3192	tags=47%, list=23%, signal=37%	3459/4773/915/3458/196/3119/5530/917/6772/3717/3127/4792/5599/3108/3594/7046/3556/7048/3109/149233/3551/3572/3112/30009/6777/5600/916/6776/3662/51561/3566/4088/3091/3569/4790/1147/919/50615/3115/4775/3320/5603/3716
hsa04934	Cushing syndrome	121	-0.394631	-1.90251	2.41903e-05	0.00134256	0.00101429	3976	tags=50%, list=29%, signal=36%	7482/8622/5151/1857/196883/8325/1385/1584/2932/11211/4221/5605/595/9586/5925/79798/84699/83439/185/3949/1026/10488/3164/1019/148327/775/8326/8322/81029/949/2767/51384/3777/50940/5566/8313/112/109/10297/11091/7473/54361/1017/5331/111/2516/80326/7976/90993/6770/8912/405/8913/8312/64764/7472/1956/1869/115/7474
hsa04640	Hematopoietic cell lineage	82	0.409764	1.98839	3.46768e-05	0.00164963	0.00124628	2907	tags=44%, list=21%, signal=35%	2322/915/948/3119/3575/917/914/4311/3127/929/966/3108/3676/952/4254/3109/909/960/3112/951/1438/930/7850/924/911/926/916/1440/290/3552/931/3566/1436/3672/7037/3569
hsa04060	Cytokine-cytokine receptor interaction	218	0.29171	1.65514	6.91768e-05	0.00287949	0.00217543	2977	tags=30%, list=21%, signal=24%	3459/3458/6362/8807/27178/5008/3596/959/53833/729230/9966/10850/6358/3575/6356/6367/58191/6351/4049/355/27242/3577/7852/608/3578/3455/10663/6355/3586/4050/132014/3953/3594/7046/3556/653/10673/6361/7048/1234/149233/8995/3572/1438/7850/8792/60401/8809/6348/1440/939/4055/9235/51561/2920/3552/3566/3606/1436/2921/8740/27302/3569/8764/6364/50615
hsa05332	Graft-versus-host disease	26	0.56839	2.11043	0.000205665	0.00686057	0.00518311	3392	tags=69%, list=24%, signal=52%	3811/3458/942/3119/3127/355/3108/3821/3109/3112/3002/3134/3552/3569/3133/3115/3812/3824
hsa04061	Viral protein interaction with cytokine and cytokine receptor	76	0.403609	1.92018	0.000206023	0.00686057	0.00518311	3353	tags=46%, list=24%, signal=35%	6362/8807/27178/53833/729230/10850/6358/6356/6367/6351/4049/3577/7852/6355/3586/6361/1234/3572/8809/6348/4055/2920/3606/1436/2921/8740/3569/8764/6364/10803/6347/2826/7133/6376/6368
hsa05417	Lipid and atherosclerosis	173	0.295047	1.60491	0.000229139	0.00693666	0.00524059	3272	tags=40%, list=23%, signal=31%	1649/5608/4773/948/4689/3309/10333/959/1536/637/998/10010/5530/816/2081/581/22926/7097/3383/3717/91860/29108/355/653361/4792/929/5599/3312/4318/4780/114548/834/5908/5606/3551/4688/7099/3845/6348/5600/9451/54205/10451/7409/3310/2920/4615/5906/836/3606/841/2921/4893/5290/25833/3569/4790/805/1147/5291/572/1555/29110/4775/3320/5603/6347/6648/57534
hsa00270	Cysteine and methionine metabolism	44	-0.504121	-1.9961	0.000319094	0.00885487	0.00668979	2767	tags=48%, list=20%, signal=38%	1491/4191/64902/7263/2729/587/4548/10768/4357/259307/84245/26227/2730/875/55256/1788/586/1786/6611/23743/191
hsa05310	Asthma	24	0.567154	2.04734	0.000422177	0.0108142	0.00817006	2142	tags=54%, list=15%, signal=46%	3596/959/3119/6356/3127/5553/3578/3586/3108/3109/3112/6037/8288
hsa05152	Tuberculosis	134	0.32328	1.70876	0.000641092	0.0152488	0.0115204	3341	tags=43%, list=24%, signal=33%	3459/3458/8767/3656/10333/637/8915/533/3119/11151/7879/5530/843/5289/6772/820/816/4046/581/7097/3717/3127/91860/1594/929/5599/3586/3108/3109/5868/3112/10892/7099/8411/5600/54205/26253/51561/9114/4615/3552/64127/836/3606/841/23365/2213/7421/3569/4790/805/572/3115/5603/3716/2212/4261/972
hsa04392	Hippo signaling pathway - multiple species	27	-0.559588	-1.98983	0.000891119	0.0197828	0.0149458	3894	tags=59%, list=28%, signal=43%	23286/84962/79981/54798/79633/8642/60485/7004/7003/8994/122786/1454/7005/126374/4771/10413
hsa05321	Inflammatory bowel disease	53	0.428146	1.89761	0.00112309	0.023241	0.0175584	3126	tags=55%, list=22%, signal=43%	3459/3458/8807/3596/3119/6772/7097/3127/6775/3586/3108/3594/3109/149233/3112/4094/30009/7099/8809/51561/3552/64127/3566/4088/3606/3569/4790/50615/3115
hsa05323	Rheumatoid arthritis	70	0.384171	1.80782	0.00118648	0.023241	0.0175584	3238	tags=50%, list=23%, signal=39%	1513/7010/3458/942/533/3119/528/7097/3383/3127/523/4050/3108/10673/3109/9550/3112/7099/8792/6348/51561/2321/9114/2920/3552/51382/54/3606/2921/3569/6364/3115/3683/6347/1493
hsa04927	Cortisol synthesis and secretion	52	-0.448055	-1.85057	0.00128714	0.0233409	0.0176339	3971	tags=54%, list=29%, signal=39%	8622/5151/196883/1385/1584/9586/84699/185/3949/10488/3164/148327/775/949/2767/3777/5566/112/109/5331/111/2516/90993/6770/8912/8913/64764/115
hsa05224	Breast cancer	119	-0.355954	-1.70156	0.00137033	0.0233409	0.0176339	3717	tags=42%, list=27%, signal=31%	54567/1857/8325/2100/6464/2932/2247/11211/7157/5605/595/5925/83439/1026/2099/3725/208/4041/1019/8326/8322/81029/51384/3479/2250/23462/369/5295/1950/8313/122011/10000/10297/5293/5296/7473/54361/23493/80326/8600/7976/2064/8312/53358/7472/3265/1956/1869/7474/2260
hsa05169	Epstein-Barr virus infection	161	0.287361	1.55926	0.00140186	0.0233409	0.0176339	3192	tags=37%, list=23%, signal=29%	9541/5608/2923/915/9636/3516/637/811/896/5701/3119/917/6772/581/7097/3383/3127/3065/355/4792/953/3455/5599/5714/6891/3108/3109/5606/7874/3551/960/3112/930/5600/916/54205/7128/22938/3134/4615/9134/695/836/841/5290/4939/5700/3569/4790/1147/919/5291/5971/3133/956/3115/29110/3683/5603/3716
hsa04145	Phagosome	119	0.327833	1.71107	0.00151019	0.0233541	0.0176438	3350	tags=40%, list=24%, signal=31%	9341/948/4689/10333/1536/811/3688/533/3119/11151/7879/5289/7277/528/7097/4353/3127/653361/55176/929/523/6891/3108/200576/3109/9550/7057/4688/84790/5868/3112/7099/8411/3134/9114/51382/8685/60/4481/2213/1781/7037/3133/3115/2204/23480/2212/23673
hsa05414	Dilated cardiomyopathy	84	-0.385455	-1.74485	0.00154291	0.0233541	0.0176438	4556	tags=55%, list=33%, signal=37%	781/7137/488/7273/779/93589/3908/7171/3678/3694/6445/196883/784/10368/6442/9254/59285/6444/59283/3680/4000/783/3693/3673/59284/8515/775/3675/3479/5566/112/6547/109/7139/786/22801/111/71/1674/6443/284217/115/8516/7042/3691/3655
hsa04217	Necroptosis	91	0.339058	1.67351	0.00185124	0.0252081	0.0190445	3258	tags=41%, list=23%, signal=31%	3459/3458/5837/1536/637/6772/816/581/3717/1540/29108/355/6775/3455/5599/8605/10059/114548/27243/834/255189/283748/7099/6777/54822/6776/197259/7128/11035/3552/329/841/51652/2512/3320/3716/5836
hsa05205	Proteoglycans in cancer	174	-0.308924	-1.54912	0.00185333	0.0252081	0.0190445	3390	tags=36%, list=24%, signal=27%	11211/7157/5605/595/4087/1026/2099/208/2316/7410/2318/3693/3673/3339/5781/8326/8322/81029/7078/2817/10855/5727/51384/3479/7422/369/5295/287/5566/387/3316/2002/6300/10000/1975/5293/5296/6469/5170/7473/7023/54361/5335/6714/80326/7976/2064/71/858/2719/2065/6383/7472/3265/1277/1956/7474/2017/7042/2260/22808/2317
hsa04622	RIG-I-like receptor signaling pathway	49	0.413776	1.77574	0.00194438	0.0252081	0.0190445	3173	tags=41%, list=23%, signal=32%	9636/1654/10010/7706/843/54941/64135/1540/9474/4792/5599/3551/64343/5600/9140/841/4790/1147/29110/5603
hsa05225	Hepatocellular carcinoma	138	-0.33511	-1.64563	0.00202774	0.0252081	0.0190445	3701	tags=40%, list=27%, signal=30%	1857/8325/6464/2932/11211/7157/5605/595/6602/4087/2940/5925/2944/83439/1026/208/4041/1019/8326/8322/81029/51384/8289/6595/369/5295/55274/8313/2002/122011/10000/10297/9817/221357/5293/5296/7473/55193/54361/51412/5335/6597/80326/7976/71/6598/8312/53358/6601/7472/3265/1956/1869/7474/7042
hsa05140	Leishmaniasis	60	0.379568	1.74042	0.0020439	0.0252081	0.0190445	3324	tags=48%, list=24%, signal=37%	3459/3458/4689/1536/3688/3119/6772/7097/3717/3127/653361/4792/3586/3108/3676/3109/4688/3112/7099/5600/5579/4615/3552/5743/4790/3115/5603/3716/2212
hsa04510	Focal adhesion	179	-0.308796	-1.55606	0.00218733	0.0256805	0.0194014	3559	tags=36%, list=26%, signal=27%	6464/5880/1299/2932/56924/5923/4636/595/9564/3725/3680/208/2316/7410/894/4638/2318/3693/3673/8515/55742/8395/8394/3675/10398/1101/63923/7059/1288/3479/5154/7422/5295/1950/387/2002/23396/5063/10000/5293/5296/1311/5170/22801/3912/1291/331/6714/2064/71/1293/858/53358/1398/3265/1277/1956/10298/284217/7424/8516/3691/3655/2317/1399
hsa05164	Influenza A	123	0.307888	1.59905	0.00223644	0.0256805	0.0194014	3337	tags=40%, list=24%, signal=31%	3459/390748/3458/3836/51284/4928/637/896/3119/7706/6772/581/3383/3717/64135/3127/29108/355/4792/3455/3108/114548/834/3109/3551/3112/7099/2224/5579/54205/4615/3552/60/836/3606/841/5290/4939/4600/3569/4790/1147/5291/3115/29110/3716/6347/1021/4261
hsa04390	Hippo signaling pathway	120	-0.335564	-1.607	0.00261439	0.0290197	0.0219242	3718	tags=44%, list=27%, signal=33%	84552/1857/8325/3996/332/84962/2932/1742/11211/595/4087/4092/83439/79981/268/894/1741/56288/5516/8326/60485/8322/7004/81029/1453/353500/7003/51384/8994/122786/5515/5518/8313/1454/10297/7473/7532/7005/54361/84612/4086/80326/23513/7976/71/126374/650/8312/7472/4771/7474/7042/10413
hsa03050	Proteasome	32	0.468802	1.8106	0.00270463	0.029053	0.0219493	3708	tags=59%, list=27%, signal=44%	5682/23198/3458/5698/143471/5701/5694/5714/5692/51371/5693/5691/5686/5684/5700/5688/5720/5685/5707
hsa05330	Allograft rejection	27	0.474475	1.77893	0.00404016	0.0420429	0.0317631	3126	tags=52%, list=22%, signal=40%	3458/959/942/3119/3127/355/3586/3108/3109/3112/3002/3134/3133/3115
hsa04612	Antigen processing and presentation	49	0.389938	1.67343	0.00466585	0.0470827	0.0355706	3553	tags=49%, list=26%, signal=37%	3811/2923/3458/3309/811/3119/3127/6891/3312/3108/3821/3109/3112/926/3310/3134/3133/3115/3320/3812/4261/972/3824/5720
hsa00280	Valine, leucine and isoleucine degradation	41	-0.444539	-1.72903	0.00480775	0.0470877	0.0355744	2743	tags=37%, list=20%, signal=29%	27034/64902/223/549/587/259307/1962/65985/3712/586/64087/5096/4329/1892/10449
hsa04062	Chemokine signaling pathway	164	0.260436	1.40727	0.00506125	0.0471733	0.035639	3365	tags=40%, list=24%, signal=31%	6362/7074/998/10235/729230/6093/2773/409/10850/6358/6772/6356/6367/146850/2268/59345/58191/6351/3717/3702/653361/4792/3577/7852/10663/6355/107/3055/6361/1234/5908/3551/7454/5294/6777/3845/6348/5579/10451/7409/6011/108/2920/2185/673/5906/2788/9844/2921/1794/4893/5290/23533/4790/1147/6364/5291/5567/572/54331/10803/6347/2826/6376/6368/57580
hsa04650	Natural killer cell mediated cytotoxicity	90	0.32869	1.62701	0.00509981	0.0471733	0.035639	4506	tags=54%, list=32%, signal=37%	3459/3811/4773/3458/10870/637/259197/5530/3383/355/9436/3455/3821/4068/7305/3002/3845/4277/135250/5579/10451/7409/100507436/2185/673/836/22914/4893/5290/919/5291/3133/3683/3812/962/3824/5534/9437/6452/27040/3823/2207/8795/5777/5881/117157/25759/8743/5336
hsa05014	Amyotrophic lateral sclerosis	261	0.235821	1.37147	0.00526007	0.0473407	0.0357655	3173	tags=32%, list=23%, signal=25%	1649/5682/5608/23165/4928/3309/9782/637/6396/64446/143471/10010/9821/5903/9896/5701/5530/5289/90550/7277/1537/203228/2081/581/22926/57679/1347/5694/55746/7381/125965/5714/8021/5692/51164/5693/55567/834/5691/5606/10126/84790/5868/847/84701/4709/4711/7175/4731/79023/1340/5600/4715/54539/9451/54205/5686/7385/55102/4725/5684/201625/8408/60/6428/836/4704/29796/81929/84516/5700/1345/9631/4695/257202/28…
