# Supplementary material for: Exploration of key genes associated with oxidative stress in polycystic ovary syndrome and experimental validation
Source: Front Med (Lausanne). 2025 Feb 27;12:1493771. doi: 10.3389/fmed.2025.1493771 (PMC11904916; doi:10.3389/fmed.2025.1493771)
Supplement: Supplementary file 9 [file Table_9.xls]

## Sheet: TNFSF10.kegggsea
ID	Description	setSize	enrichmentScore	NES	pvalue	p.adjust	qvalues	rank	leading_edge	core_enrichment
hsa04064	NF-kappa B signaling pathway	83	0.614681	2.70695	1e-10	3.33e-09	1.98947e-09	2056	tags=52%, list=15%, signal=44%	695/7099/2920/10892/4615/7706/7189/4050/598/929/7187/84433/27040/3383/7188/2921/5971/5328/5579/1460/2919/8915/6351/142/958/7128/4790/4792/597/1647/10673/29760/959/596/3551/5336/114609/23586/8737/472/4616/5970/5335
hsa04145	Phagosome	119	0.556515	2.60168	1e-10	3.33e-09	1.98947e-09	2686	tags=52%, list=19%, signal=42%	3109/3117/3108/2212/7099/4688/2204/653361/3684/3115/7057/6891/3916/929/30835/2214/7280/3133/9114/1520/4689/84617/4973/3134/203068/7097/64581/3678/2213/51143/50617/245972/527/535/3105/821/5878/4481/3111/81035/3693/3119/71/11151/4353/84790/534/7277/948/1536/5869/1778/155066/53407/10382/523/10383/718/60/7037/8417/200576
hsa04380	Osteoclast differentiation	102	0.562275	2.57399	1e-10	3.33e-09	1.98947e-09	2987	tags=52%, list=21%, signal=41%	10859/695/11025/2212/4688/653361/6688/2354/1436/11027/54/7189/11006/2214/9846/2355/7048/2885/7305/2353/5971/2534/8061/4689/10990/3458/4790/3937/7297/4792/2213/5601/1432/4773/1435/29760/3551/5336/3716/353514/1385/79168/5970/55423/5290/10379/5604/6850/3454/23118/5534/6772/5293
hsa04621	NOD-like receptor signaling pathway	145	0.513422	2.47945	1e-10	3.33e-09	1.98947e-09	2969	tags=50%, list=21%, signal=40%	7099/58484/64127/2633/2920/4615/7189/115362/598/5027/8772/4939/4671/7187/834/7188/2921/118429/22861/22900/115361/114548/4940/2919/11035/64170/23710/7128/4790/4210/2634/7297/838/4792/51393/5601/10392/114769/29108/1432/3326/91662/7531/5330/596/3551/388646/4938/841/3716/8737/55054/5970/1669/1508/55894/84674/9641/820/3665/1536/5580/837/6347/10379/387/8767/5585/3454/23118/10628/90550/6772
hsa04650	Natural killer cell mediated cytotoxicity	90	0.570276	2.55849	1e-10	3.33e-09	1.98947e-09	2987	tags=56%, list=21%, signal=44%	8743/10451/5777/6452/7409/3683/2214/3133/3002/2885/27040/3383/8795/919/7305/4068/5579/2534/2207/6654/3458/5894/79465/135250/3937/962/3823/5058/10870/4773/3824/3105/5336/117157/3821/3811/5335/22914/637/2185/355/5290/5604/6850/6464/3454/5880/5534/3689/5293
hsa05131	Shigellosis	182	0.490814	2.42816	1e-10	3.33e-09	1.98947e-09	2909	tags=45%, list=21%, signal=36%	9844/7099/5581/58484/10095/10892/4615/7189/1729/598/5829/9267/929/89869/9181/7307/63916/4671/87/834/7188/114548/3059/27128/826/960/5216/8915/10097/4790/8678/823/57521/199746/10092/4792/55062/25851/3678/5601/10392/29108/1432/581/7321/3101/5330/596/3551/10096/5336/3611/8737/55054/2308/472/10093/84335/71/10241/5970/58498/5335/10318/5580/837/7335/6714/718/60/5290/23048/387/8767/9564/7157/10398/5481/3…
hsa05132	Salmonella infection	208	0.437608	2.20991	1e-10	3.33e-09	1.98947e-09	3099	tags=44%, list=22%, signal=35%	8743/9844/5294/197259/7099/58484/10095/4615/3071/7189/112574/9267/929/8772/5606/63916/7280/4671/6934/834/8795/2353/114548/27128/5788/11035/5216/10097/84617/5894/23265/203068/10121/4790/7097/9648/29109/10092/838/4792/5058/5601/10392/1785/6932/29108/51143/1432/581/3326/596/3551/10006/10096/841/114609/5878/8737/10093/9842/71/9367/84790/2316/5970/140735/58498/7277/83439/1639/5869/127829/837/1778/2320…
hsa05135	Yersinia infection	120	0.531939	2.4917	1e-10	3.33e-09	1.98947e-09	2987	tags=48%, list=21%, signal=38%	9844/10451/2212/7099/58484/10095/4615/7456/7189/7409/5829/5606/63916/7454/4775/920/27040/834/2353/114548/10097/2335/3586/4790/3937/4210/10092/4792/3678/5601/29108/1432/4773/3551/10096/925/10093/6195/71/9815/5970/5335/3676/2185/23396/6347/6714/60/5290/5604/387/9564/5585/644150/23118/5880/3654/5293
hsa05152	Tuberculosis	134	0.520427	2.48727	1e-10	3.33e-09	1.98947e-09	3021	tags=53%, list=22%, signal=42%	3109/3117/972/3108/2212/7099/4046/3684/818/64127/3115/10892/4615/7189/26253/3916/929/8772/30835/2214/4261/317/2207/9114/1520/8915/3458/5894/64170/3586/4790/7097/64581/2213/5601/1432/50617/581/245972/527/535/596/7421/841/114609/5878/3716/3111/4802/3587/3119/11151/1385/5970/820/637/1263/8625/5869/843/6714/718/387/8767/3656/6850/5534/3689/6772/3654/817
hsa05169	Epstein-Barr virus infection	161	0.510718	2.4823	1e-10	3.33e-09	1.98947e-09	2987	tags=48%, list=21%, signal=39%	695/3109/3117/9134/3108/3115/4615/6891/7189/3683/8772/5606/4939/3133/7187/3383/6892/919/7188/5971/317/4940/917/960/3134/958/6774/953/7128/4790/7097/3627/7297/51426/4792/5601/10018/1647/1432/581/29760/596/3105/3551/4938/915/841/5336/3716/1027/23586/3280/3516/8737/3111/5704/4616/3119/5970/965/9641/637/3665/916/355/595/5290/10379/2208/6850/7157/1021/3454/23118/5708/6772/3654/5293
hsa05164	Influenza A	123	0.50932	2.39504	1.30157e-10	3.94021e-09	2.35404e-09	2987	tags=49%, list=21%, signal=39%	8743/3109/3117/3108/7099/3115/4615/7706/8772/4939/4600/5371/10482/7187/4261/3383/834/8795/8106/114548/317/5579/4940/51284/3458/5894/4599/4790/3627/7297/4792/29108/581/3551/4938/841/3716/23586/3111/64135/3119/103/71/10241/5970/9230/11100/9641/637/3665/355/6347/60/5290/10379/5604/1021/3454/6772/5293
hsa04062	Chemokine signaling pathway	164	0.460378	2.24977	1.477e-10	4.01226e-09	2.39709e-09	3007	tags=43%, list=22%, signal=34%	3055/9844/10451/23533/1794/54331/5294/113/653361/57580/2920/2870/2268/7409/5829/7454/3577/2885/2921/6348/7852/5579/2919/2773/10235/6654/5894/408/6351/6774/4790/2771/3627/6355/58191/4792/1524/5058/6362/6354/409/1234/5330/3551/6372/5336/2782/4283/5970/1232/5566/5335/2185/5580/6368/2788/3702/6347/6714/5290/5604/387/9564/6464/6357/729230/5880/6772/5293/5906/6360
hsa04142	Lysosome	112	0.525628	2.43623	1.56635e-10	4.01226e-09	2.39709e-09	3355	tags=53%, list=24%, signal=40%	9516/23457/9583/54/1522/162/3916/3423/6556/4668/22901/2588/5660/9114/1520/57192/3482/411/26088/968/5641/8907/50617/245972/527/535/4125/1512/1497/23062/2720/9476/10577/3073/26503/2548/1510/1508/1521/8905/23312/2629/2517/1657/2519/768239/4864/427/26985/5538/79158/285362/4126/23431/1213/51172/8906/20/4074
hsa05162	Measles	111	0.514968	2.38423	2.15335e-10	5.12189e-09	3.06002e-09	2987	tags=53%, list=21%, signal=42%	9134/7099/4615/7189/598/8772/30835/4939/4600/7187/2353/317/4940/1460/917/51284/6504/4599/6774/7128/4790/7097/7297/4792/2213/5601/581/3310/6776/596/3551/4938/915/841/3716/1027/23586/64135/103/9367/5970/27102/440275/9641/637/3665/916/355/595/5290/10379/8667/7157/1021/3454/23118/6772/3654/5293
hsa04662	B cell receptor signaling pathway	70	0.59142	2.53576	2.67585e-10	5.94039e-09	3.54902e-09	1965	tags=47%, list=14%, signal=41%	10859/10451/695/5777/933/11025/10892/11027/27071/11006/7409/4775/84433/2885/25780/2353/5579/974/6654/8915/10990/5894/4790/4792/2213/4773/29760/3551/5336/353514/79168/3635/5970
hsa05130	Pathogenic Escherichia coli infection	161	0.460662	2.23901	8.45775e-10	1.76027e-08	1.05165e-08	3240	tags=46%, list=23%, signal=36%	8743/5777/4542/2212/7099/10095/4615/3071/4644/7456/7189/4627/9267/9181/8772/7280/4671/834/8795/2353/9170/114548/3059/27128/2534/10097/84617/203068/4790/10092/4792/5058/5601/29108/1432/581/7009/3551/10006/10096/4629/841/64005/114609/10061/8737/10672/10093/71/8440/84790/5970/9826/7430/4641/7277/55971/355/837/10382/10383/6714/60/23191/387/2768/9871/644150/23118/3654/375/51208/51807/4793
hsa04612	Antigen processing and presentation	49	0.646751	2.55963	1.91635e-09	3.75379e-08	2.24266e-08	2153	tags=61%, list=15%, signal=52%	3109/3117/972/3108/3115/6891/3133/4261/920/6892/1520/3458/3134/3823/5641/3326/3310/3824/3105/821/10197/925/3111/4802/3821/3811/3119/1385/1508/8625
hsa05161	Hepatitis B	132	0.467667	2.22541	3.70296e-09	6.85048e-08	4.09275e-08	2987	tags=42%, list=21%, signal=34%	9134/7099/4615/7189/8772/5606/4775/7048/6778/7187/2885/4318/2353/6554/1960/317/5579/6654/5894/6774/4790/7097/7297/4792/4088/5601/1432/581/4773/6776/596/3551/841/114609/3716/23586/64135/6775/1385/2002/5970/9641/637/3665/2185/355/843/6714/5290/5604/7157/3454/23118/6772/3654/5293
hsa05140	Leishmaniasis	60	0.600248	2.48971	3.9469e-09	6.91745e-08	4.13276e-08	2980	tags=58%, list=21%, signal=46%	3109/3117/5777/3108/2212/7099/4688/653361/3684/3115/4615/7189/2214/2353/5579/65108/4689/3458/3586/4790/7097/4792/1432/3716/3111/3119/2002/5970/3676/1536/718/23118/3689/6772/3654
hsa03010	Ribosome	98	-0.480504	-2.4355	4.53063e-09	7.5435e-08	4.50678e-08	4772	tags=65%, list=34%, signal=43%	6181/6164/6138/51065/64968/6176/6222/6193/6187/6208/6223/219927/6122/11224/6166/6230/64965/11222/6235/29074/6170/6224/6173/6144/55052/6203/28998/6234/51116/64969/6142/6124/6129/6218/79590/65005/51263/9045/65003/6210/9553/63875/6135/10573/23521/64981/51318/64979/6139/6160/4736/3921/6171/6189/51373/29093/64963/63931/6161/51081/6201/6147/6231/64928
hsa04640	Hematopoietic cell lineage	82	0.54585	2.4025	8.26013e-09	1.30982e-07	7.82539e-08	2625	tags=51%, list=19%, signal=42%	3109/3117/933/3108/3684/3115/1436/3570/952/1438/290/911/929/951/924/4311/3575/920/7850/1441/917/914/960/931/1604/3581/913/3678/1435/915/3566/925/3111/3119/945/3676/948/916/910/2057/2208/7037
hsa04666	Fc gamma R-mediated phagocytosis	80	0.534621	2.3447	1.84833e-08	2.7977e-07	1.67146e-07	3111	tags=49%, list=22%, signal=38%	3055/10451/273/2212/7408/5581/653361/10095/7409/2214/7454/9846/27040/4082/5579/65108/5788/10097/5894/10092/5058/2213/1785/10096/5336/85477/10093/3635/5335/8605/5580/23396/8398/5290/5604/6850/5880/5293/283748
hsa04660	T cell receptor signaling pathway	94	0.514704	2.32233	2.18077e-08	3.15737e-07	1.88634e-07	2632	tags=44%, list=19%, signal=36%	1493/10451/5777/10892/7409/4775/84433/920/2885/10125/27040/919/2353/917/2534/5788/6654/8915/3458/5894/3586/4790/3937/4792/5058/5601/1432/4773/959/3551/915/925/8440/5970/5335/916/5170/3702/5290/5604/387
hsa05417	Lipid and atherosclerosis	173	0.431184	2.11381	3.07072e-08	4.26063e-07	2.54547e-07	3021	tags=42%, list=22%, signal=33%	8743/10451/7099/4688/653361/818/2920/4615/7189/7409/598/929/5606/4775/7187/3383/834/8795/2921/4318/2353/6348/2081/114548/317/2919/4689/4780/4973/958/6774/4790/6648/7097/4792/5601/6256/29108/1432/581/3326/3310/4773/5330/959/596/3551/1555/841/114609/5970/5335/9641/637/3665/948/1536/355/5170/6257/6347/6714/5290/387/7157/19/23118/5534/5451/3654/5293/5906/817
hsa04659	Th17 cell differentiation	91	0.498368	2.23938	3.55691e-08	4.73781e-07	2.83055e-07	2347	tags=43%, list=17%, signal=36%	3109/3117/3108/3115/3570/4775/7048/6778/920/27040/919/2353/3556/861/917/3458/6774/3662/4790/7297/4792/4088/5601/6256/1432/3326/4773/6776/3551/915/3566/3716/3111/3119/5970/30009/5335/916/6257
hsa05323	Rheumatoid arthritis	70	0.546631	2.34372	4.12129e-08	5.27842e-07	3.15354e-07	2495	tags=47%, list=18%, signal=39%	1493/3109/3117/3108/7099/2920/3115/8741/54/4050/3683/3383/2921/2353/6348/2919/9114/3458/7097/7422/50617/245972/10673/527/535/1435/6372/3111/3119/534/155066/6347/523
hsa05235	PD-L1 expression and PD-1 checkpoint pathway in cancer	77	0.521325	2.27173	7.01744e-08	8.65484e-07	5.17074e-07	1524	tags=38%, list=11%, signal=34%	5777/7099/10538/4615/7189/29126/5606/4775/4215/920/10125/27040/919/2353/1460/917/3458/5894/6774/4790/7097/4792/27436/1432/4773/3551/915/114609/3716
hsa05167	Kaposi sarcoma-associated herpesvirus infection	151	0.429974	2.08062	7.92653e-08	9.42691e-07	5.63201e-07	2987	tags=42%, list=21%, signal=33%	3055/23533/54331/5294/9261/57580/2920/131450/8772/4775/3133/6934/7187/3383/2921/2353/2919/5894/3134/6774/4790/8678/7297/4792/5601/7422/6932/1432/581/1234/4773/3105/3551/841/5336/5155/3716/2782/7538/1385/5970/1232/5335/9641/637/83439/3665/355/64422/595/2788/6714/718/5290/10379/5604/6850/7157/1021/3454/5534/6772/5293
hsa04658	Th1 and Th2 cell differentiation	75	0.528573	2.2913	8.54253e-08	9.80918e-07	5.86039e-07	2214	tags=47%, list=16%, signal=39%	3109/3117/3108/4853/3115/4775/6778/920/27040/919/2353/917/55534/3458/4790/7297/4792/5601/1432/4773/6776/3551/915/3566/3716/3516/3111/3596/6775/3119/5970/30009/5335/4094/916
hsa04613	Neutrophil extracellular trap formation	94	0.498193	2.24783	1.029e-07	1.14219e-06	6.82387e-07	2987	tags=47%, list=21%, signal=37%	728/2212/7099/4688/653361/3684/366/3683/27180/2214/10533/2357/834/5579/51284/4689/5894/4790/7097/64581/1432/5330/51311/5336/10014/23569/10013/71/4353/8841/5970/5335/820/1536/837/6714/718/60/5290/5604/6850/5880/3689/5293
hsa04740	Olfactory transduction	246	-0.330272	-1.9214	1.51915e-07	1.63186e-06	9.74936e-07	3998	tags=43%, list=29%, signal=32%	81448/128368/127385/390036/219477/343406/390174/341568/390199/390433/390113/120586/1258/135924/390436/441933/390197/815/127077/390037/403284/219431/26188/346517/441670/390442/219437/26534/79310/403282/134083/5137/390323/390275/81050/254783/135941/26333/442191/403277/125963/341416/1262/285659/6547/26707/219875/127064/8392/4994/81696/79544/122740/219983/390066/440153/26689/340980/119772/219986/4993…
hsa05170	Human immunodeficiency virus 1 infection	166	0.410068	2.00265	1.68154e-07	1.74985e-06	1.04543e-06	2987	tags=39%, list=21%, signal=31%	54331/7133/7099/4615/6891/7189/162/598/5829/8772/5606/4775/3133/920/6892/919/7188/2353/27350/7852/5579/917/2773/5894/3134/4790/7097/164668/2771/4792/5058/5601/8907/1432/581/1234/4773/596/3105/3551/915/841/5336/8737/2782/472/25939/5970/5335/637/200315/916/2185/355/8905/2788/85363/5290/5604/23118/5880/5534/3654/5293
hsa04061	Viral protein interaction with cytokine and cytokine receptor	76	0.516542	2.24332	3.06062e-07	3.08844e-06	1.84516e-06	1768	tags=37%, list=13%, signal=32%	8743/7133/2920/8764/1436/3570/3577/8794/8795/2921/6348/7852/8809/2919/8807/6351/3586/3627/6355/1524/6362/6354/1234/1435/6372/4283/3587/53833
hsa05145	Toxoplasmosis	90	0.479164	2.14973	4.91604e-07	4.81483e-06	2.87657e-06	1783	tags=39%, list=13%, signal=34%	23533/3109/3117/5294/3108/7099/3115/4615/7189/598/5606/4261/2773/3458/958/6774/3586/4790/7097/2771/7297/345611/4792/5601/1432/3310/1234/959/596/3551/841/3716/3111/3587/3119
hsa05163	Human cytomegalovirus infection	175	0.394965	1.94163	5.78244e-07	5.50157e-06	3.28686e-06	4394	tags=50%, list=32%, signal=34%	54331/113/3570/6891/5829/8772/2778/4775/3133/2885/6892/7188/6348/7852/5579/2773/6654/5894/3134/6351/6774/4790/2771/4792/7422/1432/581/1234/4773/5330/3105/3551/841/1978/3716/8737/2782/10672/3587/1385/2002/5970/9826/1232/5566/637/2185/355/595/11214/2788/6347/6714/7248/5290/5604/387/9564/7157/2768/1021/5880/5534/5293/111/6376/3710/9138/811/3709/54205/6093/6387/5608/1026/91860/842/2767/5530/2932/3690…
hsa04670	Leukocyte transendothelial migration	94	0.477318	2.15365	8.23432e-07	7.61675e-06	4.55055e-06	3001	tags=45%, list=22%, signal=35%	10451/83593/7408/83692/4688/653361/3684/7409/3683/5829/87/3383/5175/4318/7852/5579/2773/4689/7294/2771/1432/5336/1003/71/7430/58498/5335/3676/2185/1536/3702/60/5290/1500/387/9564/10398/5880/3689/4267/5293/5906
hsa04625	C-type lectin receptor signaling pathway	92	0.467352	2.09902	1.1473e-06	1.03257e-05	6.16897e-06	3220	tags=46%, list=23%, signal=35%	9261/4046/10892/26253/30835/4775/834/5971/114548/1960/2207/8915/5894/64170/3586/4790/64581/3659/4792/5058/5601/29108/1432/4773/3551/841/5336/5970/9641/1263/5580/6714/5290/10379/387/6850/93978/5534/6772/5293/8844/51561
hsa04217	Necroptosis	91	0.462493	2.07818	1.66439e-06	1.45853e-05	8.71383e-06	3443	tags=48%, list=25%, signal=37%	8743/197259/7099/818/8772/6778/834/8795/7188/114548/11035/3458/2752/142/6774/7128/823/7297/5601/29108/581/3326/2512/6776/596/841/3716/8737/5836/6775/8605/637/1536/355/10379/3454/5481/6772/817/283748/8681/5610/128866/27183
hsa04060	Cytokine-cytokine receptor interaction	218	0.365362	1.84799	2.04452e-06	1.74571e-05	1.04295e-05	1768	tags=26%, list=13%, signal=23%	8743/7133/2920/8764/1436/8741/3570/3557/4050/23765/1438/7048/3577/3575/920/8794/7850/8795/2921/1441/27177/3556/6348/939/7852/8809/91/2919/3458/8807/6351/958/8995/3586/5008/3627/6355/58191/3581/1524/9235/6362/608/6354/10673/1234/1435/56832/1439/959/6372/3566/10220/4283/3587/3596/53833
hsa05142	Chagas disease	84	0.477724	2.11094	2.18442e-06	1.80525e-05	1.07853e-05	2987	tags=45%, list=21%, signal=36%	7099/4615/7189/8772/2778/7048/919/2353/6348/917/2773/3458/2774/3586/4790/7097/2771/4792/5601/1432/5330/3551/915/841/5521/5970/916/355/713/712/6347/718/5290/1636/714/2769/3654/5293
hsa04620	Toll-like receptor signaling pathway	74	0.501662	2.16481	2.27465e-06	1.80525e-05	1.07853e-05	2987	tags=47%, list=21%, signal=37%	7099/4615/7189/929/8772/5606/7187/2353/6348/51284/6351/958/4790/7097/3627/4792/5601/1432/3551/51311/841/114609/8737/4283/5970/9641/3665/54472/5290/5604/3454/23118/6772/3654/5293
hsa04210	Apoptosis	115	0.429432	1.9999	2.27689e-06	1.80525e-05	1.07853e-05	2736	tags=39%, list=20%, signal=32%	8743/1522/598/8772/3002/8795/2353/2081/143/317/1520/5894/142/4790/823/4792/6709/5601/597/10018/1647/581/1512/1439/596/3551/841/8737/472/4616/71/84790/5970/1508/7277/637/355/1521/5170/843/60/5290/5604/835/7157
hsa05332	Graft-versus-host disease	26	0.667545	2.30061	3.22602e-06	2.49829e-05	1.49258e-05	2242	tags=58%, list=16%, signal=48%	3109/3117/3108/3115/3133/3002/3458/3134/3824/3105/3111/3821/3811/3119/355
hsa05133	Pertussis	63	0.510988	2.1364	3.75447e-06	2.84145e-05	1.6976e-05	2980	tags=51%, list=21%, signal=40%	7099/3394/3684/4615/7189/929/834/2353/114548/2773/3586/4790/2771/3659/3678/5601/10392/29108/1432/6372/722/114609/725/717/5970/713/712/718/387/714/3689/3654
hsa05166	Human T-cell leukemia virus 1 infection	180	0.380284	1.88244	4.05178e-06	2.99832e-05	1.79131e-05	2214	tags=30%, list=16%, signal=26%	3109/3117/9134/113/3108/3115/6688/3683/598/4775/3133/7048/4215/920/3383/7850/2353/5971/917/8061/3134/2113/958/200186/4790/4792/2114/4088/5601/581/8850/4773/6776/3105/3551/821/10524/915/2005/4488/8295/3716/472/3111/6722/3119/7538/1385/64682/2002/5970/5566/8379/916
hsa05200	Pathways in cancer	432	0.301245	1.62833	6.74999e-06	4.8864e-05	2.91933e-05	2987	tags=30%, list=21%, signal=25%	54331/9134/7170/113/23604/83593/4853/818/6688/1436/3570/7189/4149/1438/598/2251/8772/2778/5371/7048/6934/6778/7187/3575/2885/9002/25780/10125/7188/1441/4318/2353/2246/7481/9170/5292/7852/861/317/5579/2773/10235/6654/10342/4780/3162/3458/5894/2113/2335/1857/8202/6774/8817/4790/2771/6789/354/51426/4792/27436/4088/5601/10018/7422/6256/8648/1647/6932/581/3326/26060/6776/5330/1439/596/3551/613/841/356…
hsa05416	Viral myocarditis	46	0.541309	2.11203	7.58699e-06	5.30513e-05	3.16949e-05	2958	tags=52%, list=21%, signal=41%	3109/3117/3108/3115/3683/3133/3383/2534/3134/958/1604/959/3105/841/3111/3119/71/1981/637/595/60/6444/5880/3689
hsa05134	Legionellosis	45	0.560062	2.17879	7.64703e-06	5.30513e-05	3.16949e-05	1461	tags=38%, list=10%, signal=34%	7099/58484/3684/2920/4615/929/4671/834/2921/317/2919/4790/7097/4792/29108/3310/841
hsa05206	MicroRNAs in cancer	134	0.404903	1.93515	1.09799e-05	7.46188e-05	4.45802e-05	4256	tags=49%, list=31%, signal=34%	9134/5581/4853/7057/3190/2885/4318/5328/6935/994/5292/4082/5579/6654/960/3162/5894/5598/27086/6774/4790/57521/3678/10018/7422/5243/596/3551/5336/5155/1027/10014/1786/472/7430/5335/11186/8434/595/324/5290/5604/387/6768/7157/6464/1021/5293/995/2033/1387/4363/9759/6659/6093/1026/1545/90427/2744/3690/1942/6624/4194/2146/7168
hsa05321	Inflammatory bowel disease	53	0.534543	2.16821	1.17951e-05	7.85552e-05	4.6932e-05	2167	tags=43%, list=16%, signal=37%	3109/3117/3108/7099/64127/3115/6778/8809/3458/8807/6774/3586/4790/7097/4088/3566/3111/3596/6775/3119/5970/30009/4094
hsa05203	Viral carcinogenesis	137	0.391926	1.87243	1.37952e-05	9.00749e-05	5.38143e-05	3630	tags=44%, list=26%, signal=33%	9134/9261/5829/3133/87/3190/7187/2885/6672/7188/1960/9114/3134/6774/4790/4792/581/245972/8850/1234/7531/6776/3105/841/85477/3716/1027/10014/3516/10013/6722/5966/1385/8841/5970/1232/5566/8379/3665/595/6714/718/5290/10379/5922/387/7533/6850/7157/1021/5293/9734/5610/3249/2033/5423/1387/83933/23352/9759
hsa04668	TNF signaling pathway	97	0.437078	1.98528	1.43773e-05	9.20702e-05	5.50064e-05	2676	tags=36%, list=19%, signal=29%	7133/197259/64127/2920/8772/5606/7187/3383/7188/2921/4318/2353/8809/2919/11035/7128/4790/3627/3659/4792/5601/1432/1435/3551/6372/841/8737/1385/5970/355/843/6347/5290/5604/3976
hsa05160	Hepatitis C	119	0.411858	1.92542	1.48875e-05	9.35388e-05	5.58838e-05	2987	tags=39%, list=21%, signal=31%	7189/8772/4939/4600/7187/2885/317/4940/6654/3458/5894/4599/6774/4790/3627/7297/4792/6256/581/7531/8554/3551/4938/841/3716/23586/10197/8737/5521/5970/27102/440275/9641/637/3665/355/595/5290/10379/5604/7533/7157/1021/3454/6772/5293
hsa05202	Transcriptional misregulation in cancer	154	0.393977	1.90505	1.54425e-05	9.52288e-05	5.68934e-05	2347	tags=32%, list=17%, signal=27%	2313/3684/4299/6688/1436/64919/4149/598/929/5371/7048/3002/7850/4318/5328/3695/6935/861/604/958/4790/2130/51426/64332/597/6256/1647/3248/581/2005/5218/1027/4005/904/2308/472/9611/4616/5966/4353/7102/2521/5970/1669/3398/4208/4094/4221/6257
hsa04657	IL-17 signaling pathway	82	0.460902	2.02861	2.42635e-05	0.000146905	8.77666e-05	2089	tags=38%, list=15%, signal=32%	2920/2354/6279/7189/23765/8772/7187/7188/2921/4318/2353/2919/8061/3458/5598/7128/4790/3627/4792/5601/6354/1432/3326/3551/6372/841/29761/6280/3596/5970/9641
hsa05221	Acute myeloid leukemia	61	0.482658	2.00852	3.45228e-05	0.000205288	0.000122647	2987	tags=43%, list=21%, signal=34%	3684/6688/1436/929/5371/6934/2885/5292/861/6654/5894/6774/4790/597/6932/6776/3551/1978/4353/5970/83439/595/5290/5604/2322/5293
hsa05330	Allograft rejection	27	0.624266	2.15044	4.15886e-05	0.000242965	0.000145157	2242	tags=56%, list=16%, signal=47%	3109/3117/3108/3115/3133/3002/3458/3134/958/3586/959/3105/3111/3119/355
hsa04068	FoxO signaling pathway	110	0.404002	1.86728	7.04243e-05	0.000399645	0.000238764	2612	tags=34%, list=19%, signal=28%	8743/114907/7048/9454/3575/2885/604/6654/8698/5894/23710/6774/3586/6446/6648/6789/4088/5601/10018/1647/1432/10365/1901/3551/1027/2308/472/2911/4616/51422/1032/901/1263/5170/595/5290/5604
hsa04936	Alcoholic liver disease	115	0.393957	1.83469	7.0808e-05	0.000399645	0.000238764	2980	tags=40%, list=21%, signal=32%	728/7099/2920/4615/7189/23765/10645/929/8772/5606/6934/7187/2921/51094/2919/4790/217/4792/5601/6932/1432/23175/3551/9663/841/114609/127/8737/2308/219/717/5970/51422/9641/83439/355/595/713/712/8310/718/1374/714/23118/223/3654
hsa04672	Intestinal immune network for IgA production	40	0.550111	2.06164	7.63246e-05	0.000423602	0.000253076	2175	tags=42%, list=16%, signal=36%	3109/3117/3108/3115/8741/23308/3695/7852/958/3586/608/10673/959/3111/3119/8174/3676
hsa04015	Rap1 signaling pathway	183	0.345848	1.71099	8.06572e-05	0.000440309	0.000263058	3001	tags=33%, list=22%, signal=27%	10451/113/83593/5028/7408/3684/7057/1436/7409/3683/2251/5606/2778/9002/25780/27040/2357/2246/9170/5579/2773/10235/5216/136/51466/5894/2889/8817/3937/2771/54518/7422/1432/1435/5330/5155/10636/9732/2248/71/5335/3397/1969/57568/6714/60/5290/2254/1500/23566/5604/387/8074/8631/9564/9223/5880/3689/51735/5293/5906
hsa05320	Autoimmune thyroid disease	28	0.591516	2.05645	9.65523e-05	0.000518579	0.00030982	1783	tags=50%, list=13%, signal=44%	1493/3109/3117/3108/3115/3133/3002/3134/958/3586/959/3105/3111/3119
hsa04622	RIG-I-like receptor signaling pathway	49	0.511963	2.02619	9.9068e-05	0.000523645	0.000312846	2419	tags=47%, list=17%, signal=39%	79132/7706/7189/8772/7187/4790/3627/54941/4792/5601/1432/55593/56832/3551/841/23586/8737/64135/5970/9641/64343/3665/843
hsa04010	MAPK signaling pathway	262	0.321182	1.65862	0.000124923	0.000641256	0.000383112	3375	tags=35%, list=24%, signal=27%	9261/4615/4296/1436/7189/1843/4149/2251/929/5606/4775/7048/4215/2885/25780/10125/8569/2353/5971/2246/3556/1847/994/5579/10235/6654/5894/408/1849/5598/8817/4790/6789/7867/1844/5058/5601/7422/1647/1432/3310/409/1435/3551/2005/5155/6195/4616/2248/6722/782/2872/774/2002/2316/5970/5566/4208/1846/51347/8605/775/5536/355/779/777/1969/2254/5494/5922/5604/3164/8074/7157/2768/5778/23118/5880/5534/2322/3654…
hsa05322	Systemic lupus erythematosus	42	0.534793	2.04139	0.00012517	0.000641256	0.000383112	2830	tags=45%, list=20%, signal=36%	3109/3117/3108/2212/3115/2214/87/3458/958/3586/959/3111/3119/717/713/712/6737/718/714
hsa04810	Regulation of actin cytoskeleton	182	0.348816	1.72567	0.000133601	0.000674077	0.00040272	2987	tags=35%, list=21%, signal=28%	10451/221178/6548/3684/10095/3071/54434/7409/4627/3683/1729/2251/5829/87/3695/2246/9170/7852/6654/5216/10097/5894/5499/2335/85464/10788/8817/10092/3696/3678/5058/10096/4629/85477/5155/10672/10093/3693/2248/8826/71/128239/54776/7430/58498/3676/23396/324/6714/60/5290/2254/23191/5604/50649/387/200576/8074/9564/2768/10398/5880/3689/5293
hsa04140	Autophagy - animal	107	0.398343	1.83058	0.000142527	0.00070838	0.000423214	2624	tags=32%, list=19%, signal=26%	23604/7189/598/10645/3916/10533/2081/79065/64419/5894/23192/23710/8678/57521/8897/55062/5601/140775/596/55054/84335/1508/5566/440275/23130/5580/5170/64422/53349/7248/5290/203228/5604/8673
hsa05216	Thyroid cancer	34	0.551944	1.99316	0.00014685	0.000719132	0.000429638	2736	tags=44%, list=20%, signal=36%	7170/6934/10342/51426/6256/1647/6932/581/4616/83439/595/6257/8031/5604/7157
hsa05100	Bacterial invasion of epithelial cells	60	0.471071	1.95391	0.000161192	0.000777928	0.000464765	3052	tags=40%, list=22%, signal=31%	9844/10095/5829/63916/3059/10097/2335/10092/3678/1785/10096/3611/10093/71/79658/6714/2549/60/5290/387/9564/6464/5293/1213
hsa05120	Epithelial cell signaling in Helicobacter pylori infection	58	0.466924	1.92499	0.000169378	0.000805757	0.000481391	2509	tags=45%, list=18%, signal=37%	1839/2920/1445/3577/2921/2919/9114/4790/4792/5058/5601/10392/1432/50617/245972/527/535/6868/3551/5336/5970/5335/534/155066/523/6714
hsa04514	Cell adhesion molecules	124	0.374409	1.75766	0.000179504	0.000841897	0.000502983	2175	tags=27%, list=16%, signal=23%	1493/3109/3117/933/3108/83692/3684/3115/3683/29126/3133/23308/6402/920/3383/5175/3695/5788/914/6614/3134/958/9019/3696/959/3105/925/3111/1003/3119/965/57689/8174/3676
hsa05146	Amoebiasis	86	0.405752	1.80422	0.000197281	0.000912425	0.000545119	2987	tags=37%, list=21%, signal=29%	5272/7099/3684/2920/911/929/2778/87/7850/2921/5579/2919/3458/2774/2335/3586/4790/7097/913/5330/5878/5970/5566/5869/910/1285/5290/3914/2769/1284/3689/5293
hsa04664	Fc epsilon RI signaling pathway	61	0.448719	1.86729	0.000276897	0.00126311	0.000754629	3111	tags=44%, list=22%, signal=35%	10451/695/7409/5606/9846/241/2885/27040/2534/2207/6654/5894/3937/5601/1432/5336/3596/3635/5335/8605/5170/5290/5604/6850/5880/5293/283748
hsa04919	Thyroid hormone signaling pathway	101	0.391096	1.78035	0.000293611	0.00132125	0.000789366	4107	tags=45%, list=29%, signal=32%	4853/6548/489/89869/9440/10499/5579/9442/5894/8202/6256/8648/8850/5330/5336/488/2308/487/9611/71/8841/5566/5335/5469/5170/595/6257/6714/60/5290/5604/7157/6772/5293/7067/5208/10025/2033/1387/25942/9882/842/5211/2932/3690
hsa04722	Neurotrophin signaling pathway	106	0.388968	1.78897	0.000344803	0.00153093	0.000914635	3240	tags=41%, list=23%, signal=31%	397/9261/818/7189/4215/2885/6654/5894/5598/396/2889/4790/4792/5601/1432/581/7531/596/3551/5336/6195/10019/5663/5970/5335/5580/5170/2549/5290/5604/387/8767/3656/7157/6464/11213/3654/5293/5906/817/57498/9500/4793
hsa04623	Cytosolic DNA-sensing pathway	37	0.52306	1.93352	0.000396809	0.00173865	0.00103874	3849	tags=62%, list=28%, signal=45%	834/11035/6351/4790/661/3627/4792/29108/3551/23586/8737/51082/103/5970/9641/3665/5434/11128/10623/4793/84265/171568/55718
hsa03250	Viral life cycle - HIV-1	53	0.468926	1.90205	0.000460859	0.00199307	0.00119074	3557	tags=43%, list=26%, signal=32%	4600/256987/920/5045/27350/7852/4599/164668/8850/1234/23534/904/8178/25939/200315/85363/55201/6829/11052/128866/27183/2033/1387
hsa04611	Platelet activation	104	0.386191	1.77044	0.000536085	0.00228867	0.00136734	3785	tags=44%, list=27%, signal=32%	23533/695/5294/113/2212/5028/7408/83706/2778/9002/10125/2534/2207/2773/10235/6786/5499/3937/2771/54518/1432/5742/5330/5336/10672/64805/71/5566/8605/6714/60/5290/8673/387/6850/5293/5906/283748/111/8681/5739/3710/9138/3709/83660/6093
hsa05205	Proteoglycans in cancer	174	0.329056	1.61694	0.000750566	0.00315974	0.00188775	2632	tags=28%, list=19%, signal=23%	10451/1839/5777/5329/7099/6548/818/7057/7409/5829/2885/4318/5328/7481/3059/5579/6654/960/5894/5499/2335/6774/7097/3678/5058/7422/1432/5336/3693/8826/71/10855/2002/54776/2316/8321/7430/5566/5335/355/5170/287/595/6714/2549/60/5290/5604/387
hsa05310	Asthma	24	0.583567	1.96746	0.000759096	0.00315974	0.00188775	1783	tags=50%, list=13%, signal=44%	3109/3117/3108/3115/2207/958/3586/6037/959/3111/3596/3119
hsa05340	Primary immunodeficiency	32	0.52794	1.88881	0.0009242	0.00379949	0.00226997	2457	tags=44%, list=18%, signal=36%	695/6891/3575/4261/920/5788/958/29760/959/915/925/8625/916/3543
hsa05220	Chronic myeloid leukemia	68	0.426203	1.80937	0.00094537	0.00383912	0.00229364	2987	tags=40%, list=21%, signal=31%	598/9846/7048/2885/861/6654/5894/4790/51426/4792/4088/1647/581/6776/3551/613/1027/4616/5970/1487/595/5290/5604/7157/6464/1021/5293
hsa05150	Staphylococcus aureus infection	71	0.417056	1.79789	0.00097034	0.00389305	0.00232586	3041	tags=41%, list=22%, signal=32%	728/3109/3117/3108/2212/2204/3684/3115/3683/25984/2214/3383/2357/3586/2213/5724/3111/3119/717/1669/55894/820/713/712/718/714/1672/3689/3886
hsa04940	Type I diabetes mellitus	32	0.521988	1.86751	0.00129387	0.00512928	0.00306444	2242	tags=41%, list=16%, signal=34%	3109/3117/3108/3115/3133/3002/3458/3134/3105/3111/3119/5798/355
hsa04136	Autophagy - other	25	0.552665	1.87396	0.00169255	0.00663081	0.00396151	2311	tags=40%, list=17%, signal=33%	10533/79065/23192/23710/8678/57521/55062/55054/23130/64422
hsa04072	Phospholipase D signaling pathway	125	0.344123	1.62063	0.00187028	0.00724188	0.00432659	3341	tags=34%, list=24%, signal=26%	23533/5294/8527/113/9267/2778/9846/3577/2885/1606/9170/27128/2534/2207/6654/5894/1785/5330/5336/5155/10672/2911/5335/8605/2185/23396/2549/7248/5290/23566/5604/387/56895/6850/2768/6464/5293/375/283748/111/56894/8681
hsa05213	Endometrial cancer	51	0.431633	1.7391	0.00215251	0.00823893	0.00492226	3299	tags=41%, list=24%, signal=32%	6934/2885/6654/5894/51426/1647/6932/581/3611/4616/2002/83439/5170/595/324/5290/5604/7157/5293/8312/10912
hsa04144	Endocytosis	200	0.303245	1.52082	0.0023093	0.00873861	0.00522079	3824	tags=37%, list=27%, signal=27%	273/10095/7456/2870/7189/23550/9267/5371/3133/7048/3577/832/7852/57154/27128/10097/408/3134/3482/9744/80223/11021/10092/4088/1785/3310/409/1234/80230/8724/2350/3105/10096/30844/5878/116985/10093/1601/6455/9815/9230/5869/23396/9922/26119/6714/6643/11267/23327/7037/387/51324/116986/8027/644150/1213/28964/375/112936/84440/51160/3305/1175/23527/128866/26056/27183/30845/2263/116984/60682/9765/1211/262…
hsa04933	AGE-RAGE signaling pathway in diabetic complications	88	0.383378	1.71502	0.0024211	0.00904209	0.0054021	2987	tags=36%, list=21%, signal=29%	5581/1729/7048/3383/5292/5579/2335/6774/4790/4088/5601/7422/1432/581/6776/5330/596/5336/1027/2308/5970/5335/1536/5580/595/1285/6347/5290/1284/1958/6772/5293
hsa04928	Parathyroid hormone synthesis, secretion and action	93	0.363294	1.63308	0.00244381	0.00904209	0.0054021	4289	tags=47%, list=31%, signal=33%	1839/113/5142/4929/2778/64386/2353/5579/2773/5894/408/2771/5144/6256/409/4324/5330/596/7421/10672/1385/9826/5566/4208/142680/6257/11214/5604/387/8074/2768/1958/111/4323/3710/9138/860/3709/1026/2767/4326/1594/4041/1386
hsa04630	JAK-STAT signaling pathway	121	0.341605	1.6048	0.00255854	0.00936258	0.00559358	3220	tags=33%, list=23%, signal=26%	5777/3570/1438/598/6778/3575/2885/1441/5292/6654/3458/5894/6774/3586/5008/3581/7297/6776/8554/56832/1439/596/3566/5155/3716/3587/3596/53833/6775/595/2057/5290/10379/3976/3454/8027/6772/5293/3953/51561
hsa00190	Oxidative phosphorylation	80	-0.343836	-1.67603	0.00274142	0.00992273	0.00592823	4142	tags=51%, list=30%, signal=36%	1339/4712/7386/56901/374291/9550/9167/127124/27068/4723/55967/1353/7388/4700/7381/1340/529/4707/341947/496/1345/51079/84701/4718/4725/4708/4704/4717/4719/528/1347/4702/6391/4695/51382/10975/1350/27089/10063/4711/4701
hsa05171	Coronavirus disease - COVID-19	177	0.308349	1.51711	0.00312798	0.0112002	0.00669144	2987	tags=32%, list=21%, signal=25%	728/1839/2212/7099/4615/3570/7189/4939/4600/7187/834/2353/114548/5579/4940/51284/4599/6774/4790/7097/3627/7297/4792/5601/1432/6868/3551/4938/51311/5336/3716/23586/64135/2162/103/717/6125/5970/5335/9641/1536/713/712/6347/718/5290/10379/6850/1636/3454/714/23118/4142/6772/3654/5293
hsa05223	Non-small cell lung cancer	67	0.394923	1.67597	0.0035517	0.0125821	0.00751704	2987	tags=37%, list=21%, signal=29%	83593/2885/5579/6654/5894/6774/6789/51426/27436/6256/1647/581/6776/5336/4616/5335/11186/5170/595/6257/5290/5604/7157/1021/5293
hsa05204	Chemical carcinogenesis - DNA adducts	40	-0.422275	-1.78648	0.004049	0.0141928	0.00847935	2969	tags=50%, list=21%, signal=39%	873/1577/10/64816/1551/54576/221357/2944/4258/119391/374875/2941/6822/2939/1571/54578/1553/1549/2940/2947
hsa04510	Focal adhesion	179	0.300572	1.48568	0.00490026	0.0169978	0.0101551	3037	tags=30%, list=22%, signal=24%	10451/7408/7791/7057/7409/1729/5829/87/2885/3695/5579/2534/64098/6654/5894/5499/2335/2889/3696/3678/5058/5601/7422/131873/596/1292/5155/3381/3611/3693/71/2002/54776/2316/58498/3676/5170/23396/595/1285/6714/60/5290/5604/387/3914/9564/6464/10398/1284/5880/5293/5906/1280
hsa05144	Malaria	38	0.460105	1.71295	0.00495541	0.0170119	0.0101636	2958	tags=45%, list=21%, signal=35%	7099/4615/7057/4035/3683/3383/5175/3458/958/3586/7097/959/22914/948/6347/2995/3689
hsa05165	Human papillomavirus infection	272	0.276713	1.4345	0.00511925	0.0172812	0.0103245	3578	tags=34%, list=26%, signal=26%	9134/4853/7057/5829/8772/4600/2778/3133/6934/7187/2885/5527/3695/7481/9114/6654/55534/5894/4599/3134/2335/1857/4790/27175/3659/7297/3696/3678/7422/6932/50617/581/245972/527/535/131873/3105/3551/1292/841/1978/3381/3716/1027/3280/3516/2308/472/3693/5521/5663/1385/8321/5970/5566/534/9641/5526/83439/3676/355/595/155066/1285/324/523/4242/7248/5290/10379/5604/3914/7157/1021/3454/9223/1284/6772/5293/128…
hsa04540	Gap junction	74	0.383568	1.6552	0.00513766	0.0172812	0.0103245	2612	tags=31%, list=19%, signal=25%	113/2778/7280/2885/5579/2773/6654/1453/84617/5894/5598/203068/2771/5330/5155/2911/84790/5566/7277/10382/10383/6714/5604
hsa00982	Drug metabolism - cytochrome P450	44	-0.391726	-1.67387	0.0053129	0.0176919	0.0105699	2074	tags=41%, list=15%, signal=35%	54576/221357/2944/125/126/4258/2330/119391/4128/2941/131/2939/128/1571/54578/1549/2940/2947
hsa04218	Cellular senescence	128	0.323381	1.53028	0.00562839	0.018557	0.0110867	2987	tags=30%, list=21%, signal=24%	9134/83593/9261/5606/4775/3133/7048/3364/678/5894/3134/2113/5499/4790/823/4088/1647/1432/4773/3105/1978/2308/472/4616/5970/204851/1874/595/2305/7248/5290/5604/7157/1021/5481/5534/90550/4683/5293
hsa04066	HIF-1 signaling pathway	93	0.350387	1.57506	0.00585991	0.0191309	0.0114295	4022	tags=44%, list=29%, signal=32%	5160/7099/818/3570/8569/5579/3162/3458/6774/4790/7422/3101/596/5336/1978/160287/1027/2872/7076/5970/5209/5335/1536/54583/5290/5604/7037/3098/5293/817/285/4843/230/2033/1387/7428/1026/7010/112398/5211/3459
hsa05215	Prostate cancer	89	0.34594	1.54788	0.00708157	0.0228948	0.0136782	2736	tags=31%, list=20%, signal=25%	9134/6934/2885/7850/4318/5328/6935/6654/5894/4790/354/4792/6932/3326/596/3551/5155/1027/2308/1385/5970/83439/5170/595/5290/6692/5604/7157
hsa04151	PI3K-Akt signaling pathway	288	0.271829	1.42078	0.00807518	0.0258561	0.0154475	3037	tags=27%, list=22%, signal=22%	23533/54331/5294/9134/7099/7057/1436/3570/598/2251/3575/2885/5527/1441/3695/2246/11140/9170/6654/5894/2335/200186/8817/4790/6446/7097/5008/57521/3696/3678/10018/7422/6256/3326/1435/7531/131873/596/3551/1292/3566/1978/5155/3381/3716/1027/2782/3693/5521/2248/1385/5970/5526/3676/5170/595/1969/2788/1285/2057/7248/5290/2254/23566/5604/3164/7533/8074/3914/6850/7157/1021/5585/3454/9223/1284/2322/5293/12…
hsa01522	Endocrine resistance	87	0.347801	1.54602	0.00816982	0.02591	0.0154797	3315	tags=34%, list=24%, signal=26%	1839/113/4853/2778/2885/4318/2353/6654/5894/8202/5601/1432/581/596/638/1027/9611/5566/5469/595/6714/5290/5604/7157/6464/1565/5293/3714/28514/111
hsa00511	Other glycan degradation	16	0.570295	1.70434	0.00854925	0.0268576	0.0160458	3595	tags=69%, list=26%, signal=51%	4123/23324/4125/2720/3073/2629/2517/2519/4126/64772/129807
hsa03060	Protein export	15	-0.550019	-1.76072	0.0108996	0.0339213	0.0202659	3015	tags=53%, list=22%, signal=42%	90701/29927/196294/58477/23480/11231/6729/83943
hsa04071	Sphingolipid signaling pathway	100	0.33361	1.51617	0.0116947	0.0360588	0.021543	2987	tags=33%, list=21%, signal=26%	5581/9846/5527/5579/2534/2207/2773/8698/5894/4790/2771/5601/1432/581/5330/1901/596/10672/140/5521/5970/5526/637/5170/5290/5604/387/7157/2768/9517/427/5880/5293
hsa00650	Butanoate metabolism	24	-0.460354	-1.70075	0.0122428	0.0374024	0.0223457	2433	tags=42%, list=17%, signal=34%	3157/123876/622/116285/3033/3155/38/79944/7915/5019
hsa00983	Drug metabolism - other enzymes	53	-0.354827	-1.56273	0.0127507	0.0385999	0.0230611	2074	tags=40%, list=15%, signal=34%	10/7371/3704/54576/221357/51727/2944/4258/119391/29922/2941/2939/4830/1571/54578/151531/1549/2940/1854/2947/8833
hsa05222	Small cell lung cancer	79	0.342978	1.49684	0.0144606	0.0433819	0.0259181	2987	tags=35%, list=21%, signal=28%	9134/7189/4149/598/7187/7188/317/2335/4790/51426/4792/6256/1647/581/596/3551/1027/4616/5970/595/6257/1285/5290/3914/7157/1021/1284/5293
hsa00280	Valine, leucine and isoleucine degradation	41	-0.370818	-1.57806	0.0146735	0.0436273	0.0260647	3715	tags=41%, list=27%, signal=30%	587/10449/316/549/27034/64087/26275/3157/56922/1738/3033/3155/38/224/5095/34/5019
hsa04014	Ras signaling pathway	202	0.279729	1.40979	0.0148268	0.0436932	0.0261041	3341	tags=32%, list=24%, signal=24%	54331/83593/1436/598/2251/9846/2885/25780/10125/27040/2246/5579/10235/6654/10156/5894/2113/8817/4790/6789/2114/5058/5601/7422/1435/3551/5336/5878/5155/2782/2248/5966/2002/5970/10928/5566/5335/11186/8605/5869/1969/2788/8398/8315/2549/5290/2254/5922/5604/387/8074/6464/5880/2322/57186/5293/5906/283748/5921/8844/22821/5923/285/8681
hsa04080	Neuroactive ligand-receptor interaction	277	-0.229221	-1.33988	0.0152796	0.0442859	0.0264581	3501	tags=32%, list=25%, signal=24%	1142/9287/1394/146/706/122876/2556/1269/113091/2900/6866/8973/399968/2567/4828/1815/1136/2696/4985/117/1813/1135/4295/10022/1143/7432/1910/3952/3360/116443/3062/5697/399967/1909/165829/1816/84539/6754/2555/5031/4887/85569/129521/148/2564/2565/1144/2891/2898/2587/3061/2642/7201/319100/100169851/2741/2641/5021/1139/3827/2922/4159/6869/134864/1443/5737/885/5539/2902/3375/3351/554/4160/7434/8620/2695…
hsa05207	Chemical carcinogenesis - receptor activation	155	0.300272	1.45739	0.0154098	0.0442859	0.0264581	2612	tags=30%, list=19%, signal=24%	113/4853/2251/2778/2885/2353/5579/2773/604/6654/5894/408/10720/6774/8817/4790/2771/7422/6256/3326/409/6776/596/7421/1555/1978/574537/9314/6195/2248/1385/774/5970/5566/2052/9641/1544/775/779/595/6257/154/6714/5290/2254/5604
hsa04070	Phosphatidylinositol signaling system	74	0.3617	1.56083	0.0154269	0.0442859	0.0264581	2686	tags=31%, list=19%, signal=25%	8527/5298/64768/117283/89869/1606/5579/64419/8821/56623/8897/5330/3631/5336/9677/3635/9807/5297/5335/23396/5290/10423/200576
hsa04912	GnRH signaling pathway	84	0.342108	1.51168	0.017138	0.0486588	0.0290707	4509	tags=49%, list=32%, signal=33%	1839/113/818/5606/2778/4215/2885/5579/6654/5894/5598/5601/1432/5330/2002/5566/8605/775/2185/5580/779/6714/5604/1958/817/283748/111/8681/4323/3710/2797/3709/5608/91860/2767/10746/801/5599/5595/5603/816
hsa00980	Metabolism of xenobiotics by cytochrome P450	47	-0.369585	-1.60251	0.0172985	0.0486588	0.0290707	2300	tags=43%, list=17%, signal=36%	22977/54576/221357/2944/125/126/4258/119391/374875/2941/6822/131/2939/128/1571/54578/1553/1549/2940/2947
hsa05214	Glioma	66	0.353794	1.49945	0.0173886	0.0486588	0.0290707	3021	tags=33%, list=22%, signal=26%	818/2885/5579/6654/5894/51426/1647/581/5336/5155/4616/5335/595/57118/5290/57172/5604/7157/6464/1021/5293/817
